# Single cell transcriptome analysis of human, marmoset and mouse embryos reveals common and divergent features of preimplantation development

Thorsten Boroviak<sup>1,2,\*</sup>, Giuliano G. Stirparo<sup>1,\*</sup>, Sabine Dietmann<sup>1</sup>, Irene Hernando-Herraez<sup>3</sup>, Hisham Mohammed<sup>3</sup>, Wolf Reik<sup>3</sup>, Austin Smith<sup>1,4</sup>, Erika Sasaki<sup>5</sup>, Jennifer Nichols<sup>1,2</sup> and Paul Bertone<sup>1,‡</sup>

## ABSTRACT

The mouse embryo is the canonical model for mammalian preimplantation development. Recent advances in single cell profiling allow detailed analysis of embryogenesis in other eutherian species, including human, to distinguish conserved from divergent regulatory programs and signalling pathways in the rodent paradigm. Here, we identify and compare transcriptional features of human, marmoset and mouse embryos by single cell RNA-seq. Zygotic genome activation correlates with the presence of polycomb repressive complexes in all three species, while ribosome biogenesis emerges as a predominant attribute in primate embryos, supporting prolonged translation of maternally deposited RNAs. We find that transposable element expression signatures are species, stage and lineage specific. The pluripotency network in the primate epiblast lacks certain regulators that are operative in mouse, but encompasses WNT components and genes associated with trophoblast specification. Sequential activation of GATA6, SOX17 and GATA4 markers of primitive endoderm identity is conserved in primates. Unexpectedly, OTX2 is also associated with primitive endoderm specification in human and non-human primate blastocysts. Our cross-species analysis demarcates both conserved and primate-specific features of preimplantation development, and underscores the molecular adaptability of early mammalian embryogenesis.

**KEY WORDS:** Blastocyst, Embryo, Human, Inner cell mass, Pluripotency, Primate

## INTRODUCTION

Metazoan life relies on the ability to develop specialised cell types from a single cell. In mammals, preimplantation development entails timely embryonic genome activation, establishment of a

pluripotent cell population to form the foetus and segregation of extra-embryonic tissues for successful implantation. This is a highly adaptive process, subject to distinct selective pressures (Sheng, 2015; Friedli and Trono, 2015; Tseng et al., 2017). While the mouse model has been instrumental for our understanding of mammalian development, comparatively little is known about early human and non-human primate embryogenesis.

Primate development is protracted compared with rodents. Human zygotic genome activation (ZGA) occurs around the eight-cell stage, in contrast to the two-cell stage in mouse (Braude et al., 1988; Yan et al., 2013; Blakeley et al., 2015). At the compacted morula stage, in both rodents and primates, outer cells establish apical-basal polarity, which provides the basis for segregation of the inner cell mass (ICM) and trophectoderm (TE). In human, POU5F1 exhibits prolonged expression in the TE (Niakan and Eggan, 2013), in contrast to earlier restriction of Pou5f1 in the mouse ICM. The lineage specifiers NANOG and GATA6 are initially co-expressed in the rodent and primate ICM, and resolve into mutually exclusive patterns (Roode et al., 2012; Niakan and Eggan, 2013; Blakeley et al., 2015; Boroviak et al., 2015; Nakamura et al., 2016; Stirparo et al., 2018), concordant with the segregation of epiblast (EPI) and primitive endoderm (PrE) lineages in the late blastocyst. The EPI represents the founding population of the embryo proper (Gardner and Rossant, 1979), while the PrE gives rise to the yolk sac (Artus and Hadjantonakis, 2012; Schrode et al., 2013). In both rodents and primates, embryo implantation into the uterine wall is a landmark event, upon which the EPI acquires epithelial polarity (Enders et al., 1986; Bedzhov and Zernicka-Goetz, 2014) and the regulatory network governing pluripotency is reconfigured (Boroviak et al., 2015; Nakamura et al., 2016).

Rodent and primate embryos implant prior to gastrulation, unlike many other eutherian species, including rabbit, pig, sheep, cow and dog. Upon implantation, the mouse EPI forms an egg cylinder with a pro-amniotic cavity. The amnion is specified via the amniochorionic fold during gastrulation (Arnold and Robertson, 2009; Rossant and Tam, 2009; Pereira et al., 2011). In contrast, primates segregate extra-embryonic amnion directly from the EPI after implantation, giving rise to a flat embryonic disc (Rock and Hertig, 1948; Enders et al., 1986; Enders and King, 1988; Enders and Lopata, 1999). Primordial germ cells may be specified from nascent amnion in primates (Sasaki et al., 2016), underscoring the importance of this lineage decision. The ability of primate EPI to form an extra-embryonic tissue immediately after implantation is a distinctive feature of primate development, but the underlying transcriptional circuitry at the late blastocyst stage has remained elusive.

Single cell profiling of human embryos (Yan et al., 2013; Blakeley et al., 2015; Petropoulos et al., 2016) has revealed a

<sup>1</sup>Wellcome Trust – Medical Research Council Stem Cell Institute, University of Cambridge, Tennis Court Road, Cambridge CB2 1QR, UK. <sup>2</sup>Department of Physiology, Development and Neuroscience, University of Cambridge, Tennis Court Road, Cambridge CB2 3EG, UK. <sup>3</sup>Epigenetics Programme, Babraham Institute, Cambridge CB22 3AT, UK. <sup>4</sup>Department of Biochemistry, University of Cambridge, Tennis Court Road, Cambridge CB2 1GA, UK. <sup>5</sup>Central Institute for Experimental Animals, Department of Applied Developmental Biology, 3-25-12 Tonomachi, Kawasaki-ku, Kawasaki 210-0821, Japan.

\*These authors contributed equally to this work

‡Author for correspondence (bertone@stemcells.cam.ac.uk)

© T.B., 0000-0001-8703-8949; W.R., 0000-0003-0216-9881; A.S., 0000-0002-3029-4682; J.N., 0000-0002-8650-1388; P.B., 0000-0001-5059-4829

This is an Open Access article distributed under the terms of the Creative Commons Attribution License (<https://creativecommons.org/licenses/by/4.0>), which permits unrestricted use, distribution and reproduction in any medium provided that the original work is properly attributed.

multitude of ICM-associated transcription factors, epigenetic regulators and signalling pathway components. However, inherent limitations in the provenance of supernumerary human embryos by the *in vitro* fertilisation (IVF) route can yield research samples of varying cellular integrity, viability in culture and developmental stage. Despite these challenges, comparison with the mouse ICM has unveiled important differences, including specific expression of *KLF17* and *ARGFX*, and increased *TGF $\beta$*  signalling pathway components. However, comparative transcriptional analysis of the second lineage decision and mature EPI specification has been impeded by lack of single-cell RNA-seq data for late mouse ICM samples to resolve distinct EPI and PrE populations (Blakeley et al., 2015). Ultimately, mouse-to-human comparisons alone are unable to elucidate subtle regulatory adaptations between individual species from broader evolutionary features.

Here, we have constructed a framework for cross-species analysis of embryonic lineages over a time course of preimplantation development in mouse, human and a non-human primate: the common marmoset (*Callithrix jacchus*). We hypothesised that defining hallmarks of early primate development would be consistently observed in human and marmoset, but not in mouse. Compiling stage-matched single cell transcriptomes from three mammalian species allowed us comprehensive insight into maternal programs, genome activation, stage-specific transcriptional regulatory networks, signalling pathways and transposable element signatures.

## RESULTS

### Cross-species transcriptome analysis of mammalian preimplantation development

Single cell embryo data was assembled from published studies and newly generated samples, to span a uniform time course of preimplantation development in human, marmoset and mouse (Fig. 1A). For human we used a compendium of RNA-seq data from multiple embryo profiling studies (Yan et al., 2013; Blakeley et al., 2015; Petropoulos et al., 2016) and extracted stage- and lineage-specific transcriptomes (Stirparo et al., 2018) that consistently recapitulate known marker expression *in situ* (Blakeley et al., 2015; Niakan and Eggan, 2013; Deglincerti et al., 2016).

We then produced single cell RNA-seq data from common marmoset embryos developed *in utero*, spanning zygote to late blastocyst preimplantation stages. Non-human primate species provide the means to collect embryos directly by non-surgical uterine flush, improving consistency of sample quality and embryo staging relative to IVF (see Materials and Methods). After screening for quality control, we retained 196 transcriptomes from 16 embryos over six developmental stages, including early and late ICM cells obtained by immunosurgery (Boroviak et al., 2015) (Fig. 1B, Table S1).

We compiled a similar data series for mouse by combining published data with newly sequenced embryos. To date, the most comprehensive transcriptome profiling analysis of mouse preimplantation development (Deng et al., 2014) did not extend to segregation of EPI and hypoblast (PrE) at the late blastocyst stage, which had limited previous cross-species comparisons to the early ICM (Blakeley et al., 2015). We therefore augmented this dataset with 117 single cell samples from the early and late ICM (Mohammed et al., 2017).

The complete dataset comprised 642 individual transcriptomes from six preimplantation stages in three mammalian species. Samples were stage matched to permit direct cross-species comparison, and sequencing libraries for all constituent samples

were produced using the Smart-seq protocol (Picelli et al., 2013) to minimise technical differences.

Principal component analysis (PCA) of human (Fig. 1C, Fig. S1A), marmoset (Fig. 1D) and mouse (Fig. 1E, Fig. S1B) showed tight clustering of samples by developmental stage and time. In mouse, zygotes differed most from other developmental stages (Fig. 1E). However, human and marmoset four-cell embryos clustered closely with zygotes, while the eight-cell stage was distinct. Significantly, the major ZGA event is reported to occur at the eight-cell stage in human (Braude et al., 1988; Yan et al., 2013). Later preimplantation stages (compacted morula, early and late ICM) from primate were in close proximity to, but spatially segregated from, eight-cell embryos (Fig. 1C-E). Separation between zygote/four-cell to eight-cell clusters, and eight-cell to the remaining stages, accounted for most of the variability. This pattern suggests two major transcriptional waves during primate ZGA and contrasts with that observed in mouse, where the greatest separation occurs between zygote and four-cell, consistent with ZGA at the two-cell stage (Fig. S1B).

Hierarchical clustering of all samples based on orthologous genes showed that the transcriptional state of zygotic embryos interrogated prior to ZGA were most related, regardless of species and distinct from other developmental stages (Fig. 1F, Fig. S1C). The remaining mouse samples clustered predominantly with early primate embryos (four cell and eight cell), while human and marmoset compacted morulae, early and late ICM were consistently associated. To further assess individual stages, we performed correlation analysis based on mutual information entropy (Fig. 1G-I). In human, zygote and four-cell embryos correlated tightly, and were distinct from the eight-cell stage. Consistent with PCA results, compacted morulae, early and late ICM were colocalised (Fig. 1G). The marmoset closely recapitulated the human profile (Fig. 1H) and late primate stages showed a high degree of similarity in a combined analysis (Fig. S1D). In contrast, developmental stages in mouse followed a different pattern: four-cell, eight-cell and compacted morulae formed one cluster, whereas early and late ICM were distinct (Fig. 1I). Thus, the global transcriptional program of the preimplantation embryo differs significantly between mouse and primates.

### The primate maternal program is enriched for ribosomal genes and contains a distinct set of epigenetic regulators

Maternally deposited transcripts are abundant in the ovum and persist to varying extents throughout early embryonic development. Among these, maternal effect genes have been defined in mouse as functionally required for early embryogenesis (Kim and Lee, 2014), but such data are not available for primates. Consistent with the established model, 3905 maternal transcripts were robustly detected (average FPKM $\geq$ 10) in the mouse zygote, with 120 present at high levels (average FPKM $>$ 300, Table S2). The majority of these high-abundance RNAs were also found in both primate species, with the notable exceptions of *POU5F1*, *HSF1* and *DICER* (Fig. 2A,B).

To extract the most prominent differences between rodent and primate maternal programs, we compared maternal transcripts in human, marmoset and mouse. Of 2939 detected in human, 74% were conserved in marmoset (Fig. 2C). Fifty-three percent of human maternal genes were found in mouse, and most displayed decreased abundance over time (Fig. 2D). Conserved maternal factors present in all three species comprised *DPPA3*, *ZARI*, *PADI6* and *ZARIL* (Fig. S2A, Table S2). Mouse-specific factors included *Atg5* and the KRAB domain protein-encoding gene *Zfp57*, which is implicated in imprint protection (Hirasawa and Feil, 2008) (Fig. S2B).

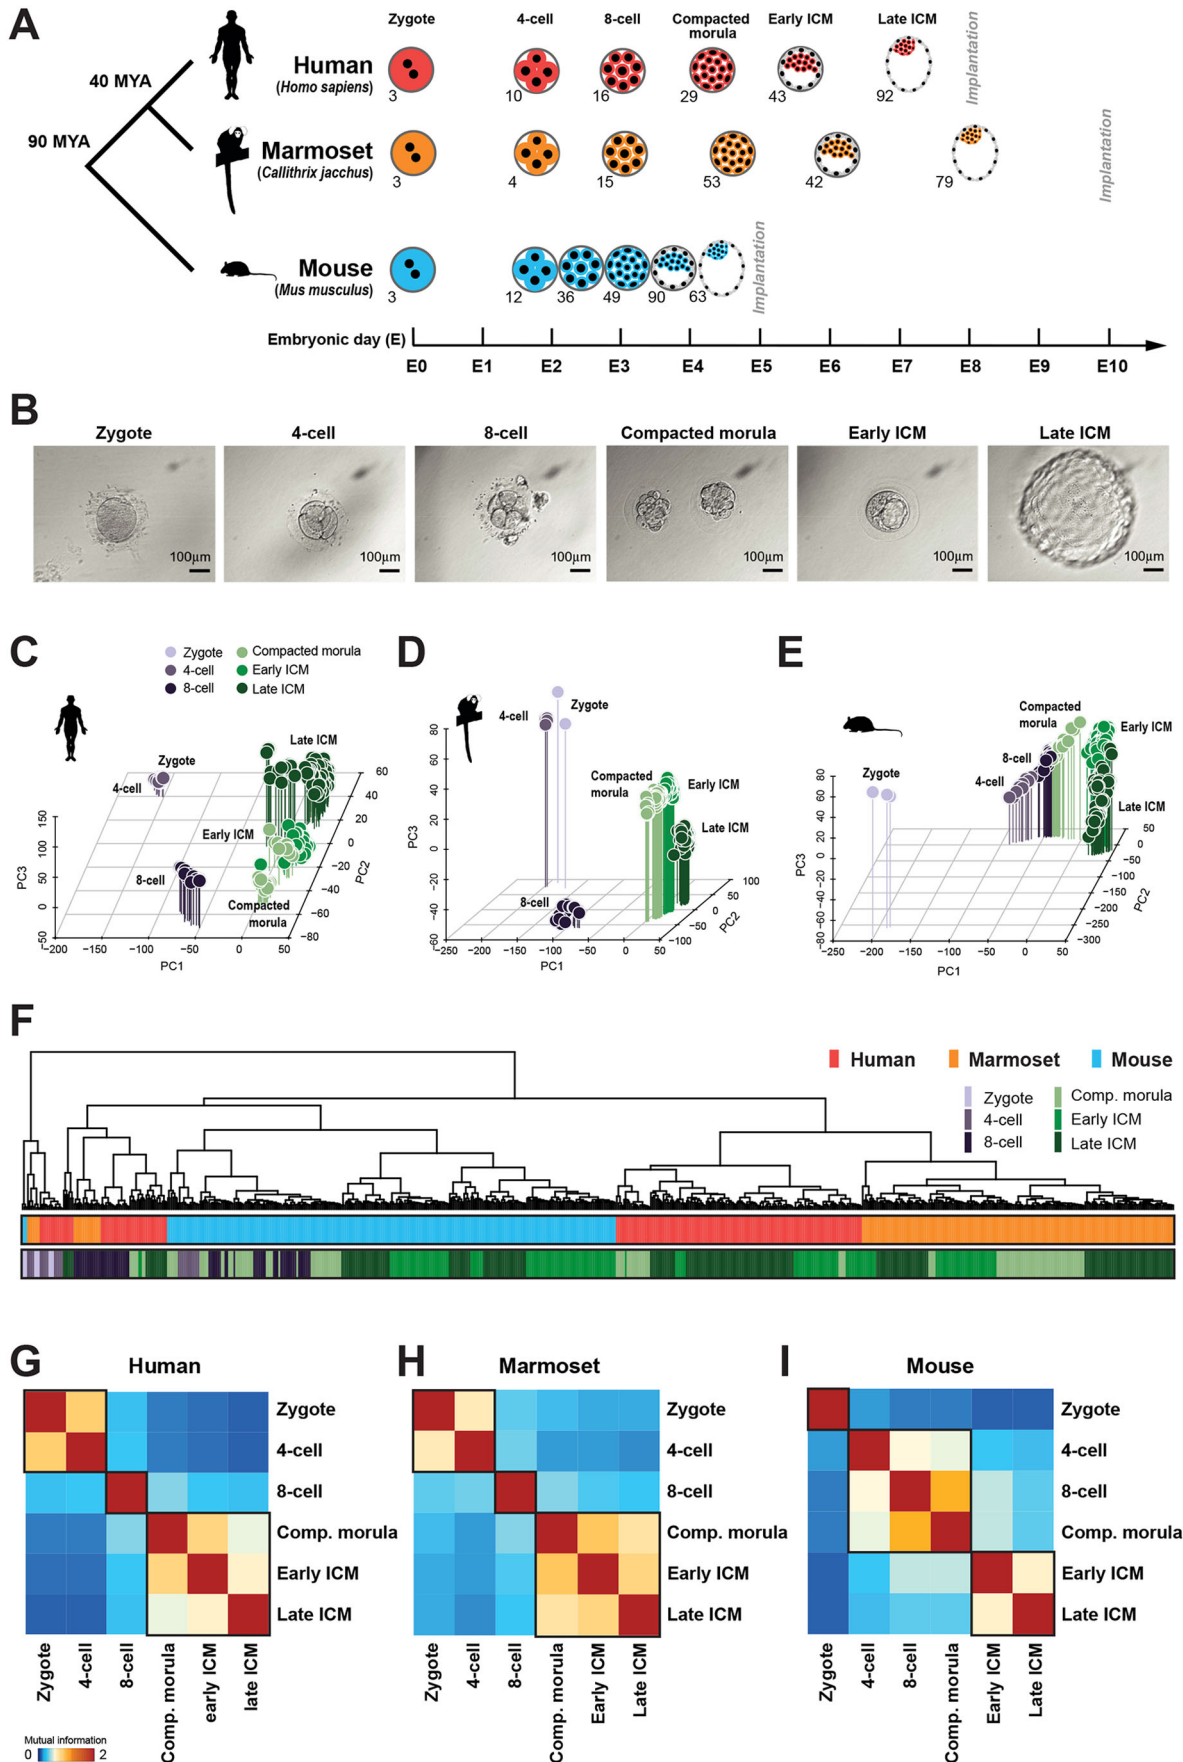

Fig. 1. See next page for legend.



**Fig. 1. Global analysis of human, marmoset and mouse preimplantation stages.** (A) Summary of single-cell RNA-seq data considered in this study. Individual transcriptome numbers are indicated for each developmental stage. MYA, million years. (B) Phase-contrast images of marmoset embryos processed for transcriptional profiling. (C-E) PCA of single cell embryo data for each species (FPKM>0). (F) Pearson correlation distance of preimplantation stages of human (red), marmoset (orange) and mouse (blue), with stages indicated below as in C. (G-I) Mutual information entropy between preimplantation stages.

At the zygote stage, 856 transcripts were present (FPKM>10) in human and marmoset, but not in mouse (Fig. 2E, Fig. S2C). Pathway and Gene Ontology (GO) analyses identified genes associated with ‘ribosome’, ‘cytoplasmic ribosomal proteins’ and ‘translational termination’, indicating an abundance of transcripts involved in translational processing (Fig. S2D). Consistent results were obtained with individual GO term analyses confined to each species (Fig. S2E-G). We compared enrichment scores of the most significant processes identified in humans with those in marmoset and mouse (Fig. 2F). General biological processes, such as ‘gene expression’ and ‘mitotic cell cycle’ were elevated in all species. However, terms associated with translation were highly enriched in primates and lacking in mouse. We also assessed individual ribosomal transcript RNA levels and found substantial reductions in mouse relative to primates (Fig. 2G). These observations suggest that primate maternal programs are adapted to ensure extended translation of maternally deposited RNAs until later ZGA at the eight-cell stage.

Mouse maternal effect genes include *de novo* and maintenance DNA methyltransferases *Dnmt3a* (Okano et al., 1999) and *Dnmt1* (Howell et al., 2001). We examined chromatin remodelling factors by hierarchical clustering (Fig. 2H, Table S2). In marmoset and human, zygotes displayed higher levels of *TAF9*, *HDAC3* and *CTR9* transcripts. *DNMT1* was abundant in primates, whereas *DNMT3A* and *DNMT3B* were also conserved in mouse (Fig. 2I). Human *DNMT3L* was present only at low levels in the zygote and four-cell embryo, but elevated at the eight-cell stage and further upregulated in compacted morulae and early ICM; the marmoset followed a similar trend (Fig. 2I). This may suggest a requirement post-ZGA. We further observed that transcript levels of key members of polycomb repressive complexes 1 and 2 (*PRC1/2*, Beisel and Paro, 2011; Morey et al., 2015), including *EED*, *SUZ12*, *EZH1* and *EZH2*, were substantially diminished or absent in primate zygotes (Fig. 2H). Strikingly, PRC components were upregulated in human and marmoset between the four- to eight-cell stages, corresponding to major ZGA timing (Fig. 2J). We conclude that PRC1 and PRC2 expression correlates with the onset of ZGA and is synchronous with species-specific developmental timing.

### Stage-specific transcription in rodent and primate embryos

We applied self-organising maps (SOMs; Kohonen, 1982) to define stage-specific gene expression modules. This allowed sorting of transcripts by expression pattern into 900 clusters per species, and identification of genes associated with each of the six developmental stages (Fig. 3A, Fig. S3A,C, Table S3). Statistical enrichment identified ‘sexual reproduction’ and ‘chromosome segregation’ as processes associated with zygotes of all three species (Fig. 3A,B, Fig. S3A-D). Human and marmoset four-cell stages exhibited evidence of ‘negative regulation of transcription from RNA polymerase’ (Fig. 3B, Fig. S3B), suggesting ZGA may be actively repressed in primates. The eight-cell stage in human and marmoset was dominated by terms relating to ZGA, whereas mouse cells showed enrichment for the JAK-STAT cascade (Fig. 3B,

Fig. S3B,D). In late ICM we observed enrichment of ‘endodermal cell differentiation’ and ‘extracellular matrix’, consistent with PrE segregation. Comparison of signalling pathways between species revealed ‘phosphatidylinositol signalling’ as conserved in zygotes, ‘spliceosome’, ‘RNA transport’ and ‘basal transcription factors’ at the eight-cell stage, and ‘lysosome’ and ‘oxidative phosphorylation’ in the early primate ICM (Fig. 3C-E).

We then extracted stage-specific transcription factors as candidates of regulatory interest (Fig. 3C-E). Human and marmoset shared *JARID2* prior to ZGA, and concomitantly upregulated *DDIT3*, *KLF17* and *YY1*, for which deletions in mouse are embryonic lethal (Donohoe et al., 1999), at the eight-cell stage. The maternal effect gene *Zfp57*, for which roles in imprint maintenance have recently been characterised (Strogantsev et al., 2015; Riso et al., 2016), was specific to mouse zygotes (Fig. 3E) but subsequently expressed in the early marmoset ICM (Fig. 3D). Human *ZFP57* expression followed the pattern observed in marmoset (Table S3). In the late ICM, we found conserved expression of *ETV4*, *SMAD6*, *KLF6* and the PrE markers *SOX17* and *FOXA2* in all species (Fig. 3C-E). Interestingly, the late mouse ICM alone expressed the pluripotency repressor *Tcf7l1* (*Tcf3*) (Wray et al., 2011; Yi et al., 2011) together with *Tcf15* and ETS-related factor *Etv5*, which is implicated in the onset of embryonic stem cell differentiation (Davies et al., 2013; Akagi et al., 2015) (Fig. 3E). The presence of such antagonists of the pluripotency network may contribute to accelerated progression of embryonic development in mouse relative to primates.

We next quantified the distribution of stage-specific genes between the three species (Fig. 3F). Human and marmoset both displayed substantially fewer zygote-specific transcripts (1261 and 1517, respectively) than mouse (3488). The inverse pattern was observed in the eight-cell embryo, correlating with ZGA in primates. By the end of the time series in late ICM cells, the numbers of stage-specific genes were similar in all species (Fig. 3F). This set of expression modules allowed us to define common and primate-specific processes at each developmental time point. Surprisingly, at the eight-cell stage, compacted morula and early ICM stages, we found little correspondence between rodents and primates (Fig. S3E-G). In human and marmoset, the eight-cell transcriptome exhibited clear signs of ZGA, whereas the early ICM featured lipid metabolism. However, in the late blastocyst, we identified several biological processes conserved in all species, including ERK signalling and upregulation of extracellular matrix components (Fig. 3G). We additionally identified a substantial fraction of primate-specific processes, primarily relating to WNT signalling, cell adhesion and apoptosis. This analysis faithfully captures known features of EPI and PrE segregation, and identifies a number of distinct features associated with this lineage decision in late primate blastocysts.

### Non-human primate EPI and PrE specification

Cluster analysis indicated enrichment for both conserved and primate-specific features at EPI and PrE specification. This second lineage decision has been extensively described in mouse (Plusa et al., 2008; Artus et al., 2010, 2011; Artus and Hadjantonakis et al., 2012; Saiz and Plusa, 2013; Kang et al., 2013; Schrode et al., 2013, 2014; Ohnishi et al., 2014), and more recently, human (Yan et al., 2013; Blakeley et al., 2015; Petropoulos et al., 2016; Stirparo et al., 2018), but remains poorly characterised in other species, including non-human primates.

PCA of marmoset cells based on genome-wide expression resolved distinct sample groups by developmental time along the



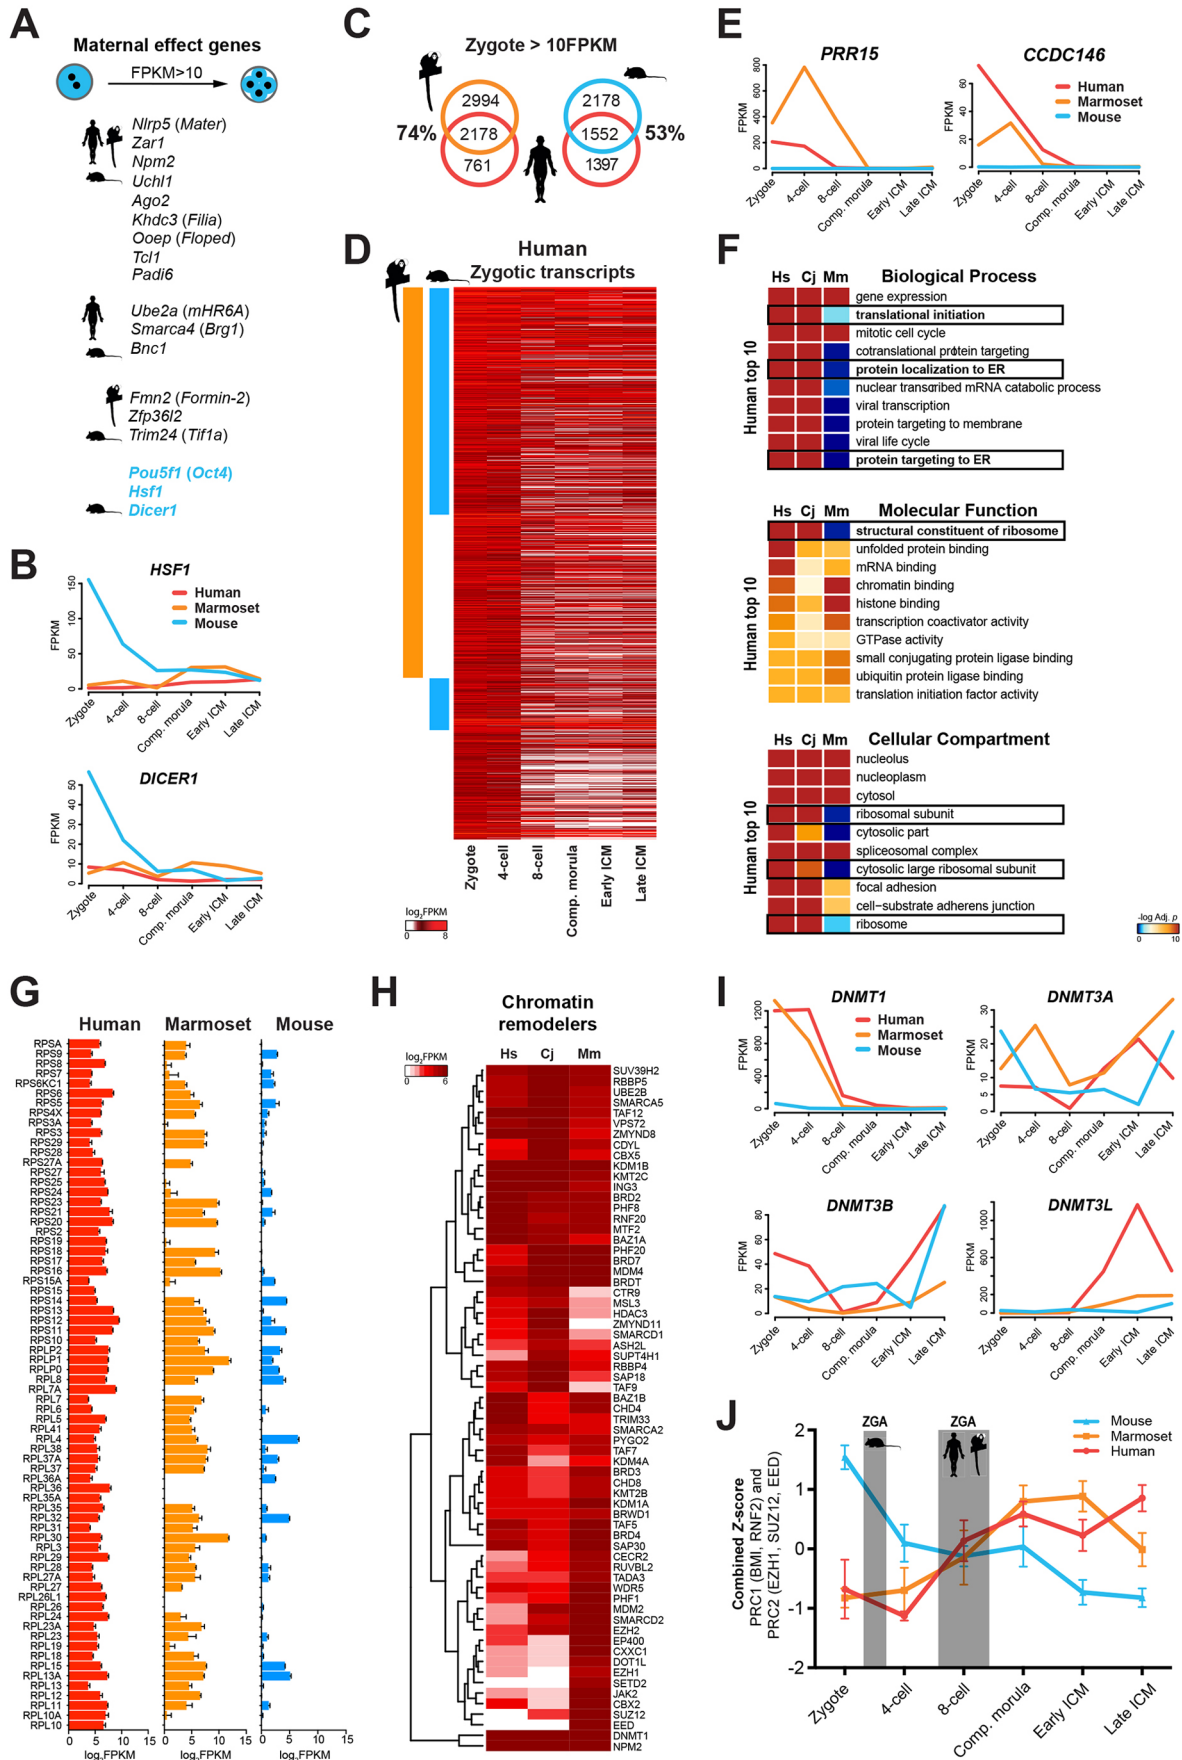

Fig. 2. See next page for legend.

**Fig. 2. Cross-species analysis of maternal gene transcripts.** (A) Schematic of mouse maternal effect genes according to Kim and Lee (2014). Symbols indicate transcripts present in the relevant species (FPKM>10). (B) Mouse-specific maternal genes in FPKM. (C) Intersection of maternal transcripts in human, marmoset and mouse zygotes (FPKM>10). (D) Maternal human transcripts (FPKM>10), conserved in marmoset (orange) and mouse (blue). (E) Primate-specific maternal genes in FPKM. (F) GO and pathway significance ( $-\log_{10}$  *P*-value) ranked according to the top 10 processes statistically enriched in human. (G) Ribosomal transcripts in FPKM. (H) One-way hierarchical clustering of chromatin remodellers in at least one species (FPKM>20). (I) DNA methyltransferases in FPKM. (J) Combined Z-score of PRC1 and PRC2 components over developmental time.

first dimension (Fig. 4A). Cells of the early ICM formed a cluster separate from compacted morulae and late ICM. Importantly, the late ICM began to diverge along the second dimension and, when those cells were examined in isolation, distinct EPI and PrE populations emerged (Fig. 4B, Fig. S4A). Pluripotency factors *TGDF1*, *NANOG*, *GDF3* and *KLF17* contributed to the EPI trajectory. Moreover, we found activin/Nodal signalling components *NODAL* and *LEFTY2* prominent in the EPI cluster. Genes contributing to PrE segregation comprised *PDGFRA*, *LAMA1*, *APOE*, *SPARC* and *RSPO3*, a positive regulator of canonical WNT signalling (Nam et al., 2006).

To independently assess whether early ICM, EPI and PrE cells represent distinct populations, we performed weighted gene co-expression network analysis (WGCNA; Zhang and Horvath, 2005) based on highly variable genes (see Materials and Methods). We extracted three major co-expression modules by unsupervised clustering, corresponding to early ICM, PrE and EPI (Fig. 4C). These populations were consistent with cell fate assignment based on PCA (Fig. 4B, Fig. S4A).

We performed differential analysis between marmoset EPI and PrE expression signatures (Fig. 4D, Table S4). The EPI transcriptional network contained *NANOG*, *LEFTY2* and *TGDF1*, whereas we identified *APOA1*, *RSPO3*, *GPC3*, *FNI*, *PDGFRA* and *LAMA1* as PrE markers. Notable among the top EPI-specific genes was *WNT5A*, further suggesting a role for WNT signalling in lineage segregation. Differentially enriched biological processes in PrE featured cell migration, adhesion and lipid metabolism (Fig. S4B). EPI-enriched processes included transcriptional regulation, proliferation and a complex network of cell death-associated nodes (Fig. 4E), consistent with our cross-species comparison (Fig. 3G). Marmoset EPI contained a ‘DNA modification’ module (Fig. 4E), and the *de novo* DNA methyltransferase *DNMT3B* was among the top 25 differentially expressed genes in marmoset EPI versus PrE (Table S4).

We used gene set enrichment analysis (GSEA; Subramanian et al., 2005) to compare EPI versus PrE transcriptional signatures between species (Fig. 4F,G). There was significant concordance of genes differentially expressed between EPI and PrE in human and marmoset (Fig. 4F), but not human and mouse (Fig. 4G). Pearson correlation of marmoset EPI to human and mouse EPI was significantly higher in human, and similar results were obtained for PrE (data not shown). Collectively, these results support conservation in transcriptional networks in late primate ICM.

Analysis of all marmoset preimplantation stages based on variable genes showed unambiguous segregation of EPI and PrE, even in the presence of pre-ZGA stages (Fig. S4C). To define robust marker sets for EPI and PrE lineage acquisition in primates, we derived developmental trajectories based on pseudotime. Plotting known pluripotency and germ-cell-associated genes allowed us to discern expression levels, temporal dynamics, heterogeneity and EPI/PrE lineage association (Fig. S4D). We confirmed the absence

of mouse-specific pluripotency markers *FBXO15*, *GBX2*, *ESRRB*, *UTF1* and *KLF2* in the marmoset preimplantation epiblast, similar to recent reports in human (Blakeley et al., 2015; Stirparo et al., 2018). *NANOG*, *ARGFX*, *TFAP2C*, *MILR1* and *KHDC3L* were already expressed in morulae and early ICM, and retained in the EPI, but were downregulated in PrE (Fig. 4H). Conversely, *TGDF1*, *LEFTY2*, *FGF4*, *IFITM5* and *IGFBP2* were expressed at low abundance at earlier stages, but sharply upregulated upon EPI specification. We identified *GATA6*, *LRP2*, *TBX3* and *ANXA3* as early PrE markers robustly expressed prior to PrE specification, whereas *APOA1*, *COL4A1*, *GDF6*, *RSPO3* and *FST* were exclusive to the mature PrE lineage.

We then mapped individual transcriptomes on a temporal trajectory for each species. Stage- and lineage-specific groups were largely apparent, recapitulating the relative duration of preimplantation development (marmoset>human>mouse) and early embryo progression characteristic of each species (Fig. 4I). We conclude that marmoset cells readily segregate into discrete clusters of early ICM, EPI and PrE, and mirror global features of human preimplantation development, including primate-specific marker acquisition and expression of canonical WNT signalling components. Temporal analysis further suggests that EPI is likely specified prior to PrE (Grabarek et al., 2012).

#### Transcriptome signatures of rodent and primate preimplantation stages

We sought to define stage-specific transposable element signatures of rodent and primate preimplantation development. Transcription was detected in human embryo cells from more than 100,000 of 4,000,000 annotated repeat loci. Analysis of variably expressed elements largely distinguished developmental stages in human (Fig. 5A), marmoset (Fig. 5B) and mouse (Fig. 5C), although such classification was less definitive than analyses based on gene expression (Fig. 1C-E). Nevertheless, PCA of late ICM cells based on transposable elements accurately segregated EPI and PrE populations in all three species (Fig. S5A-C).

To elucidate dynamics of transposon expression in human embryos, we performed hierarchical clustering of 925 sequence families (Fig. S5D, Table S5). The majority were robustly expressed during early cleavage, with a substantial decline after the eight-cell stage. Similarly, marmoset cells showed extensive downregulation at the transition from eight-cell embryos to compacted morulae (Fig. S5E). In the mouse, a large fraction of transposable element families was upregulated at the four-cell stage and the majority sustained robust expression beyond eight cells (Fig. S5F). We also examined families associated with naïve versus primed pluripotency in cultured human pluripotent stem cells (PSC) (Theunissen et al., 2016; Collier et al., 2017), and found robust expression of SINE/VNTR/Alu (SVA) elements, specifically SVA\_B, SVA\_C, SVA\_D, SVA\_E and SVA\_F, as well as HERVH-int and LTR5/7 in the human EPI (Fig. S5G). However, other families reported to be associated with naïve (SVA\_A, LTR49-int) and conventionally cultured (LTR7C, MSTA-int and THE1D-int) PSC were minimally expressed or undetectable in the EPI. A significant proportion of transposable elements detected in naïve cultures exhibited higher expression at the 8-cell and compacted morula stages than EPI, consistent with previous findings (Theunissen et al., 2016).

Transcriptome analysis based on family association is limited by considerable heterogeneity in expression of individual elements. This prompted us to determine stage-specific profiles based on individual loci, rather than family or class affiliation. Applying stringent selection

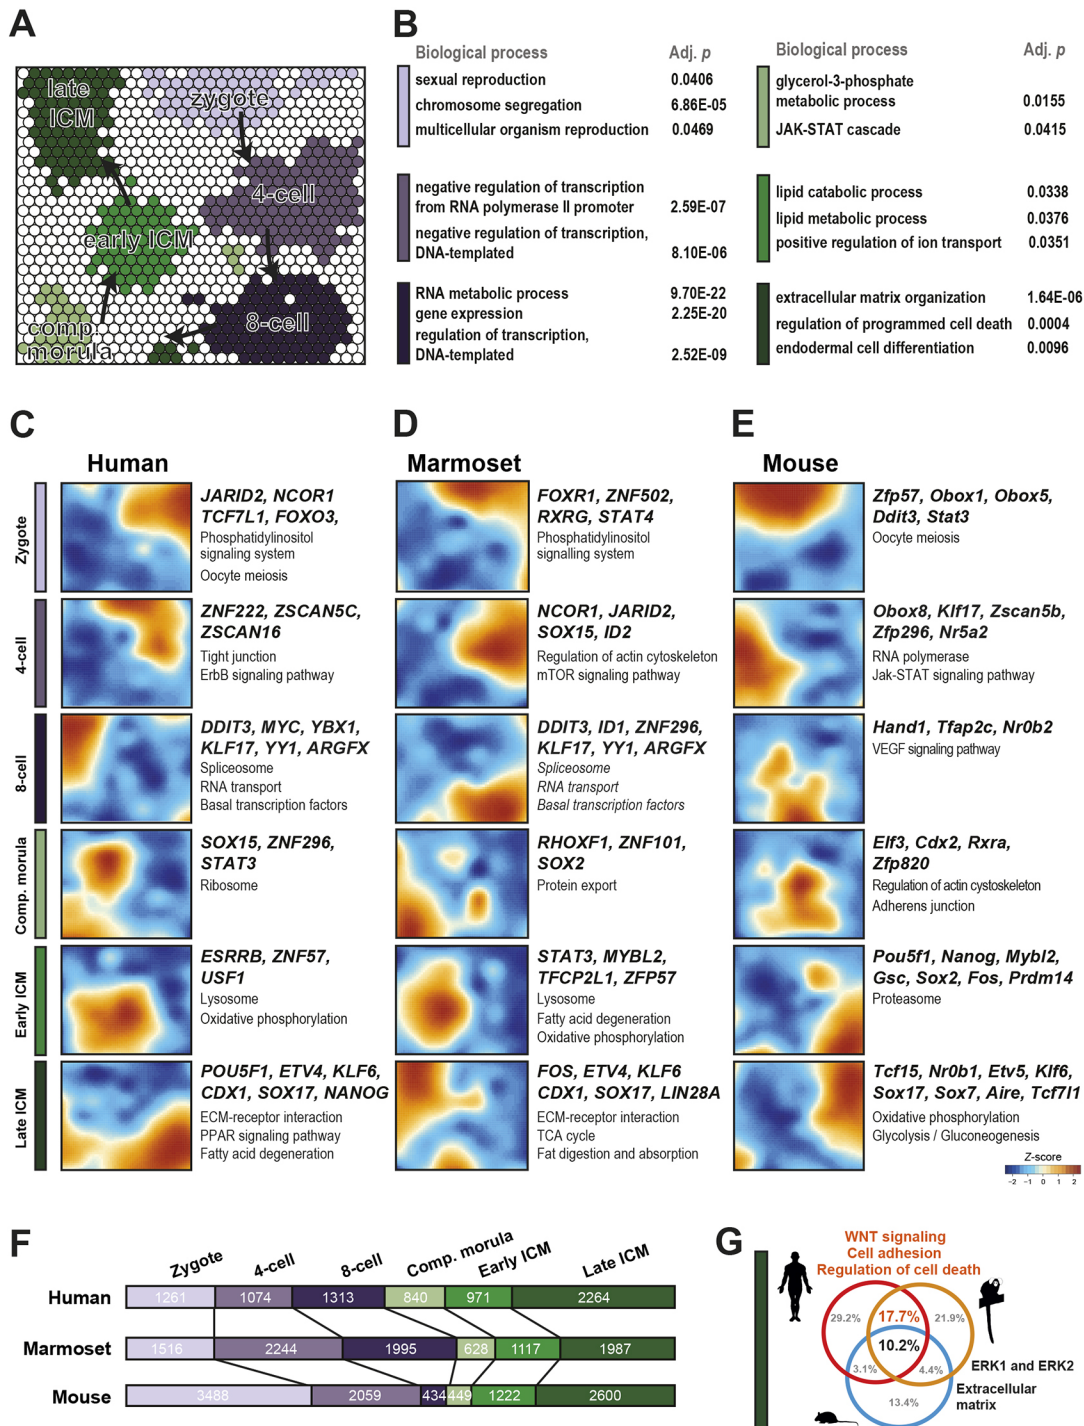

**Fig. 3. Stage-specific expression modules of preimplantation development.** (A) Self-organizing map (SOM) of developmental stages from marmoset data. Stage-specific clusters ( $Z$ -score $>1.5$ ) are indicated by colour. (B) Enriched biological processes for specific SOM clusters. (C-E) SOM of human, marmoset and mouse stages, selected transcription factors and significantly enriched ( $P<0.05$ ) KEGG pathways. (F) Numbers of stage-specific genes in each species. (G) Significantly enriched ( $P<0.05$ ) biological processes at the late ICM stage.

criteria for specificity ( $Z$ -score $>2$ ) and excluding marginally expressed transcripts (normalised counts $<10$ ) revealed more than 40,000 stage-specific elements in human and marmoset (Fig. 5D, Table S6). Mouse samples featured many transcripts enriched in zygote and 4-cell stages as well as the EPI lineage, but surprisingly few specific to eight-cell embryos (279), compacted morulae (474) and early ICM (868). This contrasted with a more uniform distribution in primates, where at least 2000 elements could be associated with any given stage.

To attempt more precise developmental staging on transposable element expression, we extracted the top 1000 (or the maximum available for three time points in mouse) specific to embryonic stages, including EPI and PrE, and assessed repeat class and family association in human (Fig. 5E), marmoset (Fig. 5F) and mouse (Fig. 5G). The most-abundant classes in human were SINE:Alu, LINE:L1, LINE:L2 and SINE:MIR. The early ICM was characterised by pronounced expression of Alu families, including



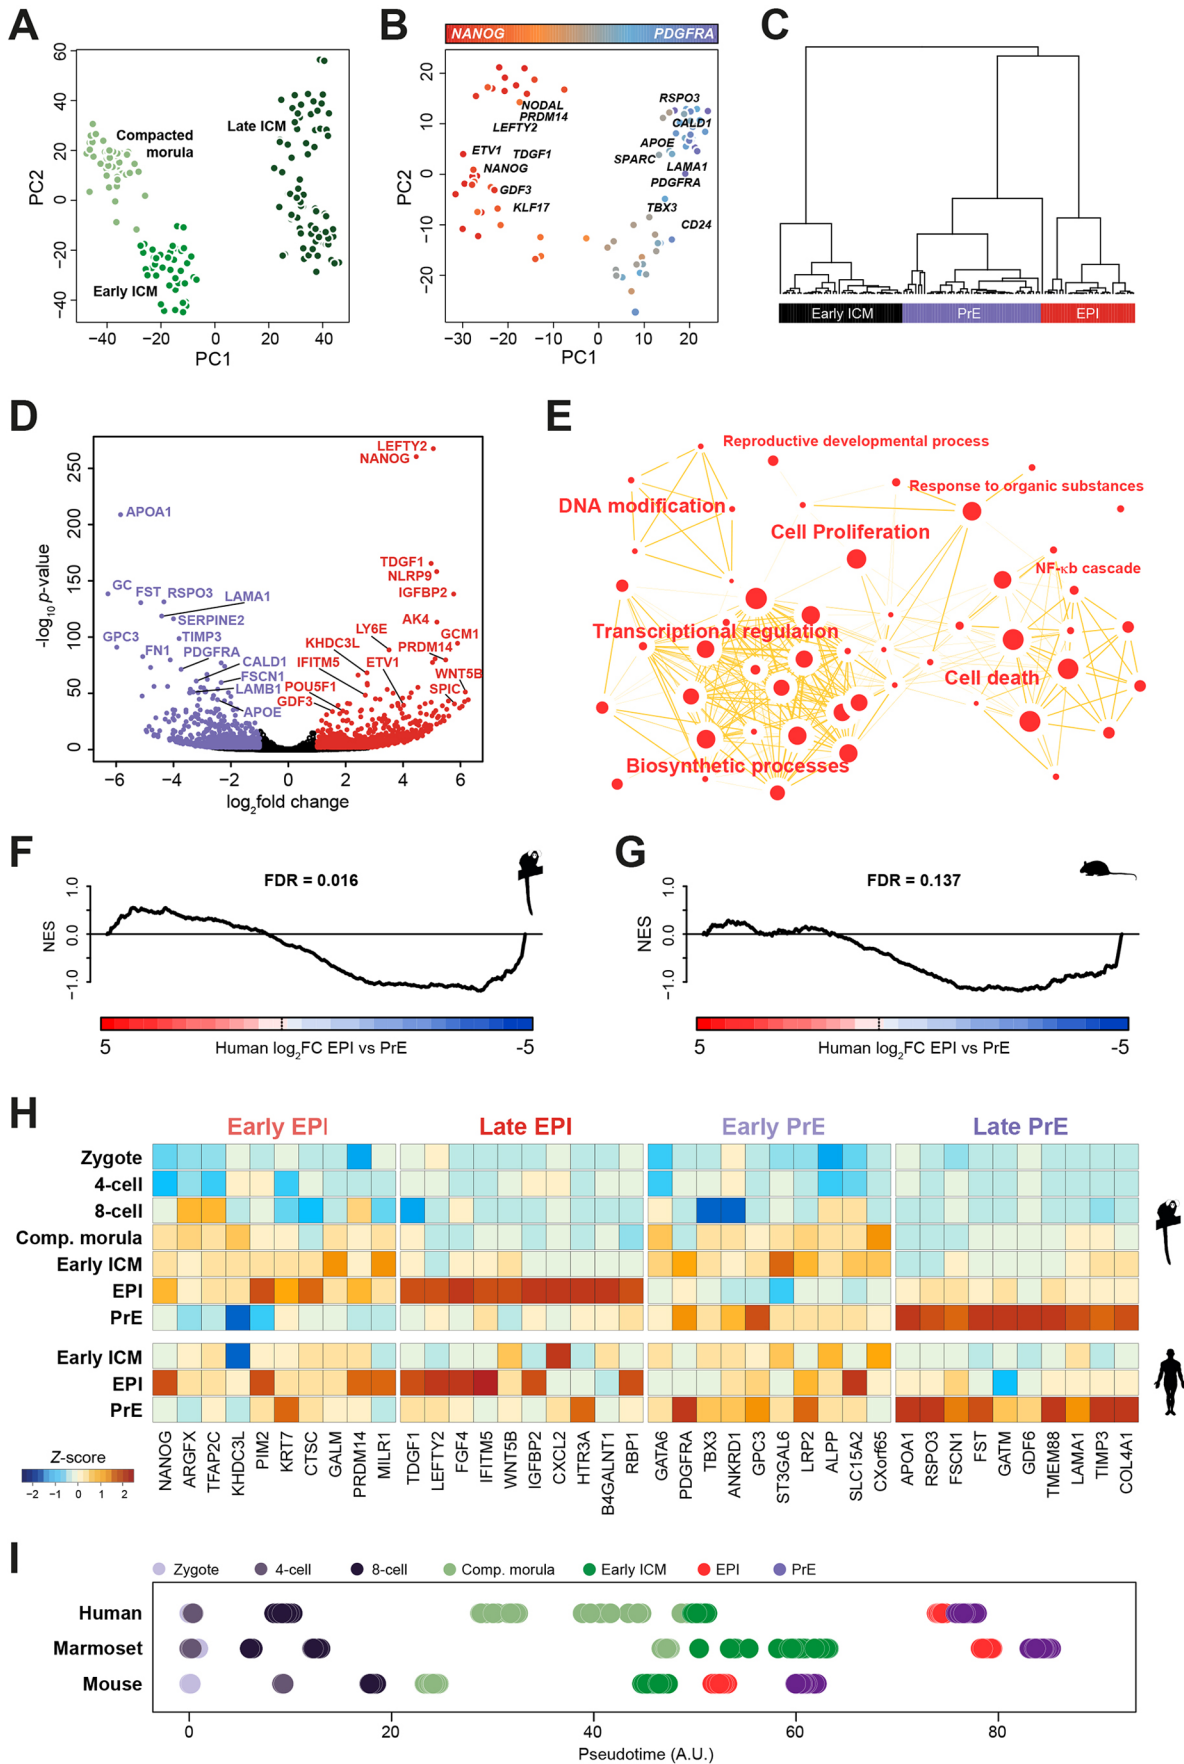

Fig. 4. See next page for legend.

**Fig. 4. The second lineage decision in the marmoset.** (A) PCA of marmoset samples from compacted morula, early and late ICM stages (FPKM>0). (B) PCA based on variable genes ( $\log_2$ FPKM>0,  $\log CV^2$ >0.5,  $n=3363$ ) for the marmoset late ICM. (C) Weighted gene co-expression network analysis (WGCNA) represented as clusters of eigengene values for early and late ICM. (D) Genes differentially expressed between marmoset EPI (red) and PrE (purple). (E) Cytoscape enrichment map of the top 50 biological processes ( $P>0.05$ ) based on absolute fold change >0.5 between PrE and EPI. (F,G) Gene set enrichment analysis (GSEA) based on genes differentially expressed between (F) human and marmoset, and (G) human and mouse EPI versus PrE. (H) Representative early and late EPI and PrE markers in marmoset and human. (I) Pseudotime analysis of human, marmoset and mouse embryonic lineages.

AluY, AluSx, AluSx1, AluJb and AluSg, and we found strong enrichment for HERVH-int, MIR2b and LTR7 in the EPI (Fig. 5E). Notably, SVAs did not feature in the top 10 transcript families of any preimplantation stage. Marmoset embryonic cells displayed similarly high abundance of primate-specific Alu families, in particular AluSc, AluSc8 and AluSx3 (Fig. 5F). The mouse expression profile differed profoundly from primates and revealed strong specificity for MTA\_Mm-int in zygote, MERVL-int at the four-cell stage, and B2\_Mm1a, B2\_Mm1t and B2\_Mm2 in the EPI (Fig. 5G). In summary, these results suggest that transposable elements can be used to discern early stages of embryonic development based on the repertoire of sequences expressed. We note considerable differences in transposable element composition between rodents and primates, and were able to resolve expression signatures for distinct preimplantation embryo lineages.

#### Conserved and primate-specific elements of the EPI and PrE transcription factor networks

We sought to derive transcription factor networks and extract a set of conserved regulators of primate pluripotency in the EPI lineage (Fig. 6A). More transcription factors were shared between human EPI and marmoset (139) than mouse (47). We constructed a core pluripotency network common to all species, based on the 282 transcription factors shared in the EPI and excluding those expressed in PrE (Fig. S6A). The conserved EPI network included the core pluripotency factors *POU5F1*, *SOX2* and *NANOG*, as well as *TFCP2L1*, *ZNF296*, *ZFP36L1* and *SOX15*. We also noted the presence of transcriptional repressor *RBPJ* and the ERK-signalling associated factors *ETV4* and *ETV5*.

We next assembled a network based on EPI-specific regulatory genes expressed in human and marmoset, but not mouse (Fig. 6B). We identified a substantial fraction of transcriptional repressors (*IKZF5*, *IFI16*, *BHLME40* and *CBFA2T2*), genes associated with DNA mismatch repair (*PMS1* and *MBD4*), and several components of NF $\kappa$ B (*BCL3* and *RELA*) and WNT (*CDX1*, *HBP1* and *HMGN3*) signalling pathways. Interestingly, the network also contained *TFAP2C* and *GCM1*, which in mouse are associated with trophoblast lineage specification (Kaiser et al., 2015; Sharma et al., 2016) and regulation of syncytium formation (Kashif et al., 2011; Lu et al., 2016), respectively. For quantitative visualisation of species specificity, we plotted relative expression of transcription factors and epigenetic modifiers (Fig. 6C). Transcription factors exclusively expressed in mouse EPI were *Klf2*, *Tcf15* and *Cited1*. Human EPI exhibited the highest levels of *SOX4* and *HAND1*, while *NANOG* expression was substantially elevated in marmoset.

We examined the dynamics of selected pluripotency factor expression in each species (Fig. 6D). Although *POU5F1*, *SOX2* and *NANOG* transcript levels correlated in equivalent lineages, *Nanog* was upregulated earlier in mouse. *TFAP2C* and *TFCP2L1* followed

this pattern, whereas *ESRRB* was expressed substantially earlier in primate embryos and subsequently downregulated in the EPI. We also found differences between primate species. Human-specific EPI factors included *CREB3L1*, *VENTX*, *HEY2* and *INSR*. Variations in insulin receptor (*INSR*) expression are potentially relevant to further refine human PSC culture conditions.

The conserved core transcription factor network for human, marmoset and mouse PrE contained many established lineage markers, including *GATA6*, *SOX17*, *HNF4A* and *GATA4* (Fig. S6B). We identified pluripotency-associated factors *TBX3* and *KLF5*, downstream targets of BMP signalling (*ID2*, *ID3*) and new potential regulators (*WDR77*, *PDLIM1*, *PCBD1* and *GTF2A2*) within the common PrE circuitry. In mouse, PrE lineage specification occurs via sequential activation of *Gata6>Sox17>Gata4>Sox7* (Artus et al., 2011). Consistent with this model, we found that *Gata6* was expressed from the eight-cell stage, *Sox17* and *Gata4* were upregulated from early ICM formation and *Sox7* expression commenced in mature PrE (Fig. 6E). Human and marmoset *GATA6*, *SOX17* and *GATA4* largely followed this pattern, suggesting a potentially similar regulatory cascade underlying PrE specification in primates. However, *SOX7* remained low in marmoset throughout all developmental stages and absent in human.

To identify primate-specific regulators associated with PrE specification, we selected transcription factors expressed in human and marmoset PrE, and excluded those in mouse PrE (Fig. S6C,D). We noted pronounced expression of the DNA chaperone *HMGB1*, regulator of desmosomes and intermediate junctions *JUP*, and endothelial transcription factors, including *ANKRD1*, *GATA2* and *GATA3*. Surprisingly, the mouse ICM and postimplantation EPI-associated gene *OTX2* (Buecker et al., 2014; Acampora et al., 2016) was robustly expressed in the primate PrE (Fig. 6F).

In mouse, *Otx2* is first expressed in the ICM, then the preimplantation EPI (Acampora et al., 2016) and is subsequently highly upregulated upon implantation (Boroviak and Nichols, 2017). We implemented a resource to catalogue and visualise embryonic gene expression in the species analysed (app.stemcells.cam.ac.uk/GRAPPA), and compared *OTX2* patterns in each time series. We observed a consistent pattern for mouse in our dataset (Fig. 7A, Table S7). In human and marmoset, however, *OTX2* is a maternal factor and specifically upregulated in PrE (Fig. 7A, Table S7), suggesting primate-specific adaptations of conserved transcriptional regulators for EPI and PrE segregation.

To determine whether *OTX2* transcript expression in primate PrE was reflected at the protein level, we performed immunostaining. Marmoset embryos at this stage had completed EPI and PrE segregation, as evidenced by mutually exclusive detection of *NANOG* and *GATA6* (Fig. 7B). *OTX2* was expressed in a subset of cells overlying the *NANOG*-positive EPI inside the blastocyst cavity (Fig. 7C). In human blastocysts at embryonic day (E)7, we also observed mutually exclusive staining between *NANOG* and *OTX2* (Fig. 7D). We found *GATA2* was absent in EPI, present at intermediate levels in PrE and highly expressed in all trophoblast cells (Fig. 7E). *OTX2* colocalised with intermediate levels of *GATA2* inside the blastocyst, corroborating PrE-specific expression.

Rodent *Otx2* directly binds regulatory genomic sequences of *Nanog* (Acampora et al., 2016). We therefore investigated the relationship of *NANOG* and *OTX2* transcriptional activity in each species at the single cell level. *Nanog* and *Otx2* were co-expressed in all cells of the mouse EPI (Fig. S7A), whereas in human and marmoset *OTX2* was absent in half of EPI cells (marmoset 20/32,

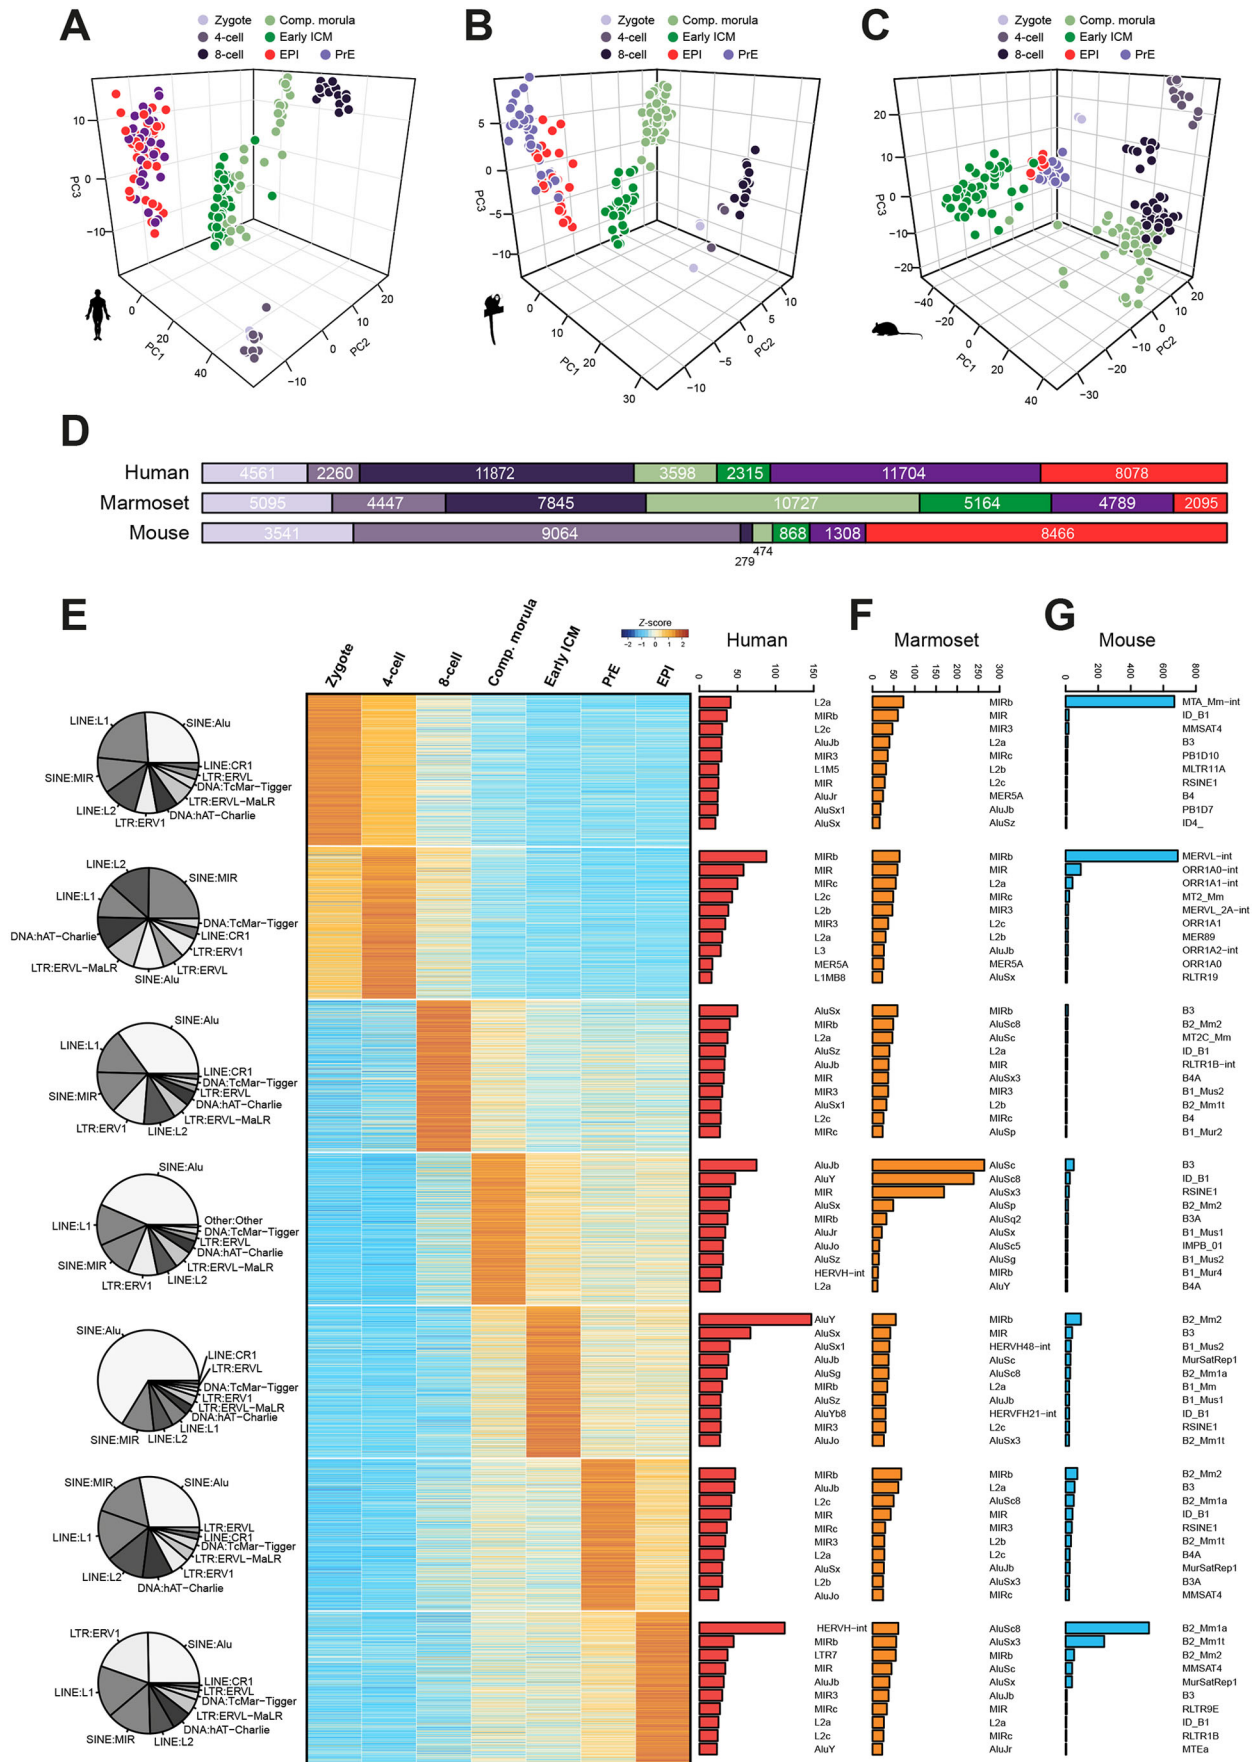

Fig. 5. See next page for legend.



**Fig. 5. The transposcriptome in preimplantation development.** (A-C) PCA of selected transposable elements ( $\log_2$  normalised count  $>0.5$  and  $\log CV^2 >1$ ) expressed in human (A), marmoset (B) and mouse (C). (D) Numbers of stage-specific transposable elements for all preimplantation stages (for individual elements = Z-score  $>2$  and normalised read counts  $>10$ ). (E) Top 1000 stage-specific transcripts in human. Pie charts indicate proportions of the 10 most abundant classes for the top 1000 stage-specific transposable elements. Bar charts display counts for the 10 most abundant families encompassing the top 1000 stage-specific elements. (F,G) Most abundant retrotransposon families for the top 1000 stage-specific transcripts in marmoset (F) and mouse (G) as defined in Table S7.

human 20/54) and expressed at low levels in the remainder (Fig. S7B,C). Mouse *Otx2* was consistently absent in PrE cells (41/44) (Fig. S7D). In contrast, *OTX2* was expressed in the majority of primate PrE cells (marmoset 34/47, human 32/38) (Fig. S7E,F). In the human embryo, cells with the highest levels of *OTX2* were devoid of *NANOG*.

This led us to investigate the dynamics of *OTX2* and *NANOG* proteins at an earlier time point. We found that, in cavitating human blastocysts ( $<100$  cells), *NANOG* and *OTX2* were co-expressed at intermediate abundance (Fig. S7G). However, in cells with strong signal for either *NANOG* or *OTX2*, expression was mutually exclusive. Similar patterns were observed in fully cavitated embryos ( $>100$  cells) (Fig. S7H). These results may indicate a role for *OTX2* in the regulation of EPI versus PrE lineage commitment in the human embryo, and the potentially divergent function of an established rodent pluripotency regulator in early primate development.

## DISCUSSION

This study assembles a compendium of single cell transcriptional data from preimplantation embryos of three mammalian species, and defines the regulatory events leading to rodent and primate EPI and PrE lineage specification. Features distinct to human and marmoset development are evident from the zygote stage. The primate maternal program is substantially enriched for ribosome biogenesis and components of the translational machinery. We identified a number of transcripts present in human and marmoset zygotes that are later confined to the EPI. Interestingly, *OTX2*, a homeobox transcription factor essential for mouse anterior forebrain identity (Perea-Gomez et al., 2001) and implicated in the progression of pluripotency (Acampora et al., 2013; Buecker et al., 2014; Yang et al., 2014; Kalkan et al., 2017), was present at high levels in both human and marmoset zygotes, and later expressed in PrE.

We also identified notable differences with regard to epigenetic modifiers. The maintenance DNA methyltransferase *DNMT1* was highly upregulated in primates. In mouse, *Dnmt3l* is required for the establishment of maternal imprints (Bourc'his et al., 2001), but *DNMT3L* was completely absent in human and marmoset. Core members of PRC1 and PRC2 complexes, including *BMI*, *EED*, *EZH1* and *SUZ12*, were scarcely detectable in the primate zygote, but were upregulated between the four- and eight-cell stages. In mouse, PRC1/2 are already established in the zygote. The presence of key PRC1/2 components at ZGA suggests a role for repressive complexes immediately following engagement of the transcriptional apparatus.

The marmoset early ICM embodies a distinct transcriptional state, in agreement with recent reports in human (Blakeley et al., 2015; Stirparo et al., 2018), *Macaca fascicularis* (Nakamura et al., 2016) and mouse (Mohammed et al., 2017). Primate early ICM cells expressed essential regulators of early mouse embryonic development, including *POU5F1*, *GATA6*, *STAT3* and *MYBL2*.

Transcripts exclusive to primate ICM were *NUCB1*, encoding a calcium-binding protein of the Golgi, *STEAP1*, a metalloredutase, and *DLC1*, a GTPase-activating protein involved in cytoskeletal reorganisation and activator of phospholipase PLCD1 (which also peaks during ICM formation). Cluster analysis revealed enrichment for lipid metabolism in human and marmoset early ICM, suggesting distinct metabolic requirements.

Progression from the early ICM leads to the establishment of naïve pluripotency in the EPI. Most current knowledge of the emergence and maintenance of pluripotent cells is derived from studies in mouse. We (Boroviak et al., 2015; Stirparo et al., 2018) and others (Blakeley et al., 2015; Nakamura et al., 2016) demonstrated that a substantial fraction of mouse pluripotency-associated factors are absent from human and non-human primate ICM, including *KLF2*, *NROB1*, *ESRRB*, *FBXO15* and *JAM2*. Cross-species analyses defined primate-specific transcription and chromatin remodelling factor circuitry in the EPI. We identified *TFAP2C* and *GCM1*, regarded as TE-associated factors in mouse, in the naïve primate pluripotency network with *KLF17*, *ARGFX*, *HESX1*, *ELF3* and *HMGB3* and several zinc-finger proteins, including *ZNF675*, *ZNF257* and *ZNF146*. It is tempting to speculate that a subset of these regulators may endow primate EPI cells with the potential for amnion specification directly after implantation (Boroviak and Nichols, 2017).

Comparative analyses of rodent and primate EPI defines conserved core pluripotency factors, in addition to *POU5F1*, *SOX2* and *NANOG*. These include *TFCP2L1* (Martello et al., 2013; Ye et al., 2013), *ZSCAN10*, which has been shown to promote genomic stability in mouse embryonic stem cells (Skamagki et al., 2017), *ZNF296*, a component of heterochromatin (Matsuura et al., 2017) reported to enhance reprogramming efficiency (Fischedick et al., 2012) and to interact with *KLF4* (Fujii et al., 2013), *ZFP36L1*, a zinc-finger RNA-binding protein attenuating protein synthesis (Stoecklin et al., 2002), and *MYBL2*, which regulates cell cycle progression and is essential for mouse ICM formation (Tanaka et al., 1999). The conserved pluripotency network further contained repressive chromatin remodelling factors *HDAC2*, *HDAC3* and *JARID2*, as well as ETS-related transcription factors (*ETV4/5*), which are involved in cell proliferation and induction of differentiation-associated genes in mouse embryonic stem cells (Akagi et al., 2015). Interestingly, we also found *RBPJ*, a transcriptional repressor regulated by Notch signalling, to be an integral part of the EPI program in all three species, despite the absence of Delta/Notch receptors. Mouse *Rbpj* is not required for self-renewal in embryonic stem cell lines, but is implicated in early differentiation and neural lineage entry (Lowell et al., 2006; Leeb et al., 2014).

Repetitive DNA sequences have been introduced into mammalian genomes over evolutionary time, and constitute approximately half of the human genome. Transposable elements are subject to epigenetic control and expression during early embryogenesis, and associated transcription may provide a signature to define developmental states. Correspondence in transposcriptome has been proposed as a metric for comparison of cultured human PSC lines to *in vivo* counterparts (Theunissen et al., 2016; Collier et al., 2017). We derived transposable element-based signatures for six embryonic stages, including EPI and PrE, and noted considerable differences in the transcript repertoire between species. Transposable element families reported in human PSCs were largely expressed in the EPI. Despite that general finding, *SVA\_A* and *LTR49-int* were barely detectable in the EPI, and instead were expressed at earlier stages. Similarities in

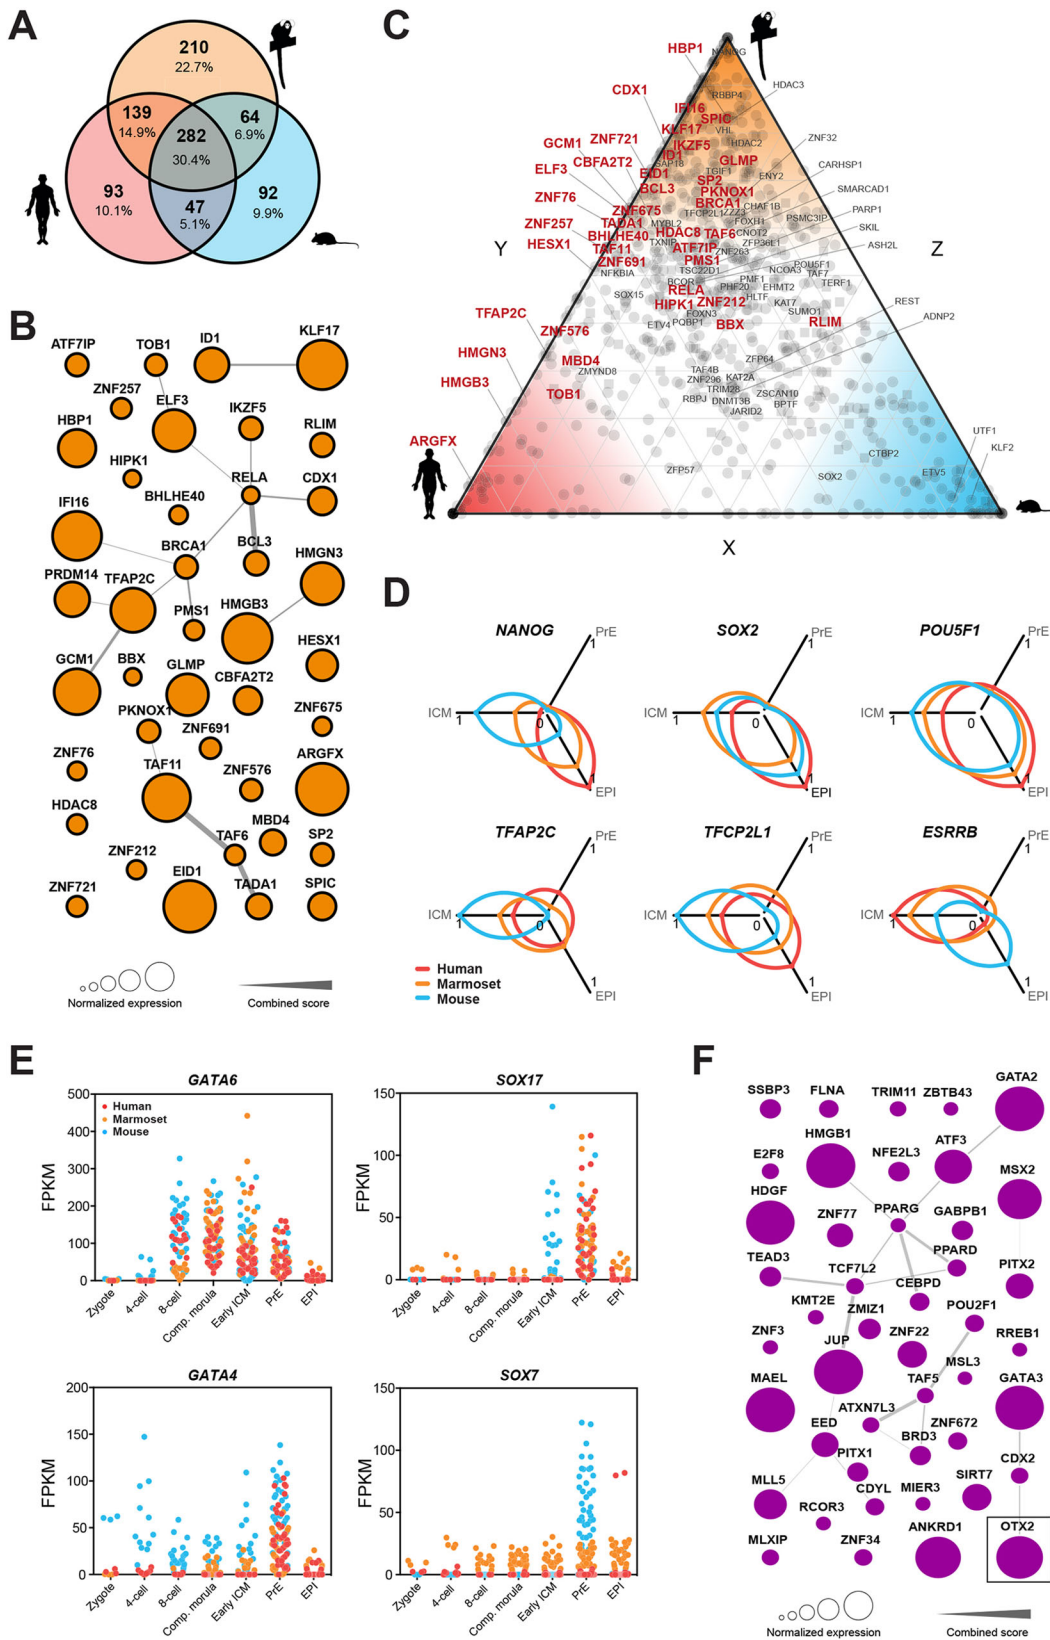

Fig. 6. See next page for legend.

transcriptome profiles of PSC cultures and morula cells may be a consequence of hypomethylation *in vitro* (Theunissen et al., 2016; Pastor et al., 2016).

Acquisition of PrE identity in primates largely recapitulated the sequential activation of lineage specifiers in mouse. *GATA6* was robustly expressed in morulae and early ICM, and subsequently

**Fig. 6. Conserved and divergent elements of EPI and PrE transcription factor networks.** (A) Intersection of transcription factors specific to EPI [FPKM>5 in EPI and not significantly ( $P>0.05$ ) upregulated in PrE]. (B) Protein-protein interaction network of primate-specific EPI transcription factors. Node sizes are scaled to normalised expression in human and marmoset; edges are derived from the STRING database. (C) EPI-enriched transcription factors (circles) and chromatin remodelling factors (squares). Axes show the relative fraction of expression in the EPI between mouse and human ( $x$ ), human and marmoset ( $y$ ), and marmoset and mouse ( $z$ ). (D) Selected markers representing normalised expression in ICM, EPI and PrE. (E) Sequentially activated canonical mouse PrE markers expressed in mouse (blue), marmoset (orange) and human (red). (F) Protein-protein interaction network of primate-specific PrE transcription factors [FPKM>5 in PrE and not significantly ( $P>0.05$ ) upregulated in EPI]. As in B, node sizes are scaled to normalised expression in human and marmoset and edges are derived from the STRING database.

confined to PrE in the late ICM, whereas *GATA4* and *SOX17* were specifically upregulated in PrE. We determined *SOX7* to be absent in primates. Notably, mouse *Sox7* is dispensable for PrE formation from mouse embryonic stem cells (Kinoshita et al., 2015), in contrast to the potent inductive function of *GATA6* (Fujikura et al., 2002), *SOX17* (McDonald et al., 2014) and *GATA4* (Fujikura et al., 2002).

We identified an array of new core PrE-associated factors present in human, marmoset and mouse. These included *KLF5*, *KLF6*, *TBX3*, *EGR1* and BMP signalling components *ID2/3*. Cluster analysis revealed enrichment for ERK signalling in all three species. However, we identified the WNT pathway as a primate-specific feature in the late ICM. Primate PrE consistently expressed *RSPO3*, a potent WNT signalling enhancer (de Lau et al., 2014). Human EPI featured *WNT3* (marmoset *WNT5B*), in contrast to complete absence of WNT ligand in mouse. We have previously shown that WNT inhibition interferes with NANOG and *GATA6* segregation in the marmoset embryo (Boroviak et al., 2015), supporting a functional requirement for WNT in primate PrE specification.

The primate-specific PrE transcription factor network contained *ANKRD1*, *PITX2*, *MSX2*, *CEBPD*, *HDGF* and mouse trophoblast markers *GATA2* and *GATA3*, which were robustly expressed in PrE, although orders of magnitude lower than in the TE lineage. A previous report has proposed *DPPA4* as a new human PrE marker (Petropoulos et al., 2016). However, our re-analysis of human datasets (Stirparo et al., 2018) with stage-matched marmoset and mouse samples showed that *DPPA4* is consistently upregulated in the EPI. Mouse-specific PrE factors were *Tfec*, *Sox7*, *Foxq1*, *Cited1* and *Hhex*. The homeobox gene *Hhex* is first expressed in PrE and during implantation confined to the distal tip of visceral endoderm (Thomas et al., 1998), which becomes the anterior visceral endoderm. Mouse *Hhex*-expressing PrE cells have a tall columnar epithelial morphology, overlying the EPI in a distal position (Rivera-Pérez et al., 2003). The absence of *HHEX* in human and marmoset PrE suggests potentially divergent mechanisms for the establishment of asymmetry in primates. Strikingly, we discovered *OTX2* as a PrE-associated gene in primates. In mouse, *Otx2* is not present in PrE but is later required for visceral endoderm movement and for the restriction of posterior signals in the EPI (Perea-Gomez et al., 2001). We show that, in primates, *OTX2* protein localises in a subset of PrE cells and becomes mutually exclusive with NANOG at the late blastocyst stage. Further studies are required to determine the role of *OTX2* in primate PrE formation.

Collectively, we present a framework for comparative molecular evaluation of human embryology to a tractable non-human primate model and the established mouse paradigm. Our cross-species analysis resolves genome-wide expression signatures of protein-

coding genes and transposable elements for major preimplantation embryo stages as a benchmark for *in vitro*-cultured cells. This work provides a resource for high-confidence, primate-specific lineage factors for future functional interrogation.

## MATERIALS AND METHODS

### Marmoset colony maintenance and embryo collection

Marmoset embryos were obtained from the Central Institute for Experimental Animals, Kanagawa, Japan (CIEA). Experiments using marmosets at the CIEA were approved by the animal research committee (CIEA: 11028) and performed in compliance with guidelines set forth by the Science Council of Japan. Marmosets were maintained as previously described (Hanazawa et al., 2012). Embryos were collected according to established methods using recently developed devices (Takahashi et al., 2014; Thomson et al., 1994). Staging of female marmoset reproductive cycles and embryo collection have been described previously (Hanazawa et al., 2012).

### Single-cell RNA-seq datasets

We compiled three stage-matched, single-cell preimplantation embryo datasets based on published and newly generated samples for human, marmoset and mouse. All samples were processed with the Smart-seq library construction method for full-length coverage of individual transcripts (Picelli et al., 2013). This resulted in a compendium of seven embryonic lineages from six developmental stages, spanning zygote, four-cell, eight-cell, compacted morula, and early and late ICM.

Human embryo transcriptomes were compiled from three single cell profiling studies (Yan et al., 2013; Blakeley et al., 2015; Petropoulos et al., 2016). These data were processed and annotated based on the analysis reported in Stirparo et al. (2018).

Marmoset samples were newly generated for this study. Embryos were staged according to cell number and embryonic day. Where appropriate, zona pellucidae were removed using acid Tyrode's solution (Sigma) and embryos were subjected to immunosurgery as previously described (Solter and Knowles, 1975; Nichols et al., 1998) using a custom rabbit polyclonal anti-marmoset antibody (Boroviak et al., 2015). Following the complement reaction, residual trophectoderm was thoroughly removed by repetitive manual pipetting. For dissociation of marmoset ICM into single cells, recovered ICM were exposed to a 1:1 mixture of 0.025% trypsin plus EDTA (Invitrogen) and 0.025% trypsin (Invitrogen) plus 1% chick serum (Sigma) for 5-10 min. Cells were dissociated into singletons by repetitive pipetting with micro-capillaries of gradually reduced inner diameter. Individual ICM cells were transferred to single cell lysis buffer and snap frozen on dry ice. Smart-seq2 libraries were prepared as described previously (Picelli et al., 2014) and sequenced on the Illumina platform in 125 bp paired-end format. These data are available via ArrayExpress accession number E-MTAB-7078.

Mouse embryo data were compiled from an earlier study (Deng et al., 2014) and augmented by samples produced in our laboratories (Mohammed et al., 2017). Single-cell transcriptome profiling of mouse preimplantation embryos has been reported (Deng et al., 2014); however, that study did not yield samples at the late ICM stage that represent distinct EPI and PrE lineages (Blakeley et al., 2015). We therefore produced stage-matched single-cell samples for early and late blastocyst ICM and sequenced RNA-seq libraries prepared with the Smart-seq2 protocol. These data have been previously described (Mohammed et al., 2017).

### RNA-seq data processing

Sequencing data from single-cell human [accession numbers SRP011546 (Yan et al., 2013), SRP055810 (Blakeley et al., 2015), ERP012552 (Petropoulos et al., 2016)] and mouse [SRP110669 (Mohammed et al., 2017) and SRP020490 (Deng et al., 2014)] embryo profiling studies were obtained from the European Nucleotide Archive (Silvester et al., 2018). Reads from each species dataset were aligned to human genome build GRCh38/hg38, common marmoset *C\_jacchus*3.2.1, and mouse assembly GRCm38/mm10 with *STAR* 2.5.2b (Dobin et al., 2013) using the two-pass method for novel splice detection (Engström et al., 2013). Read alignment



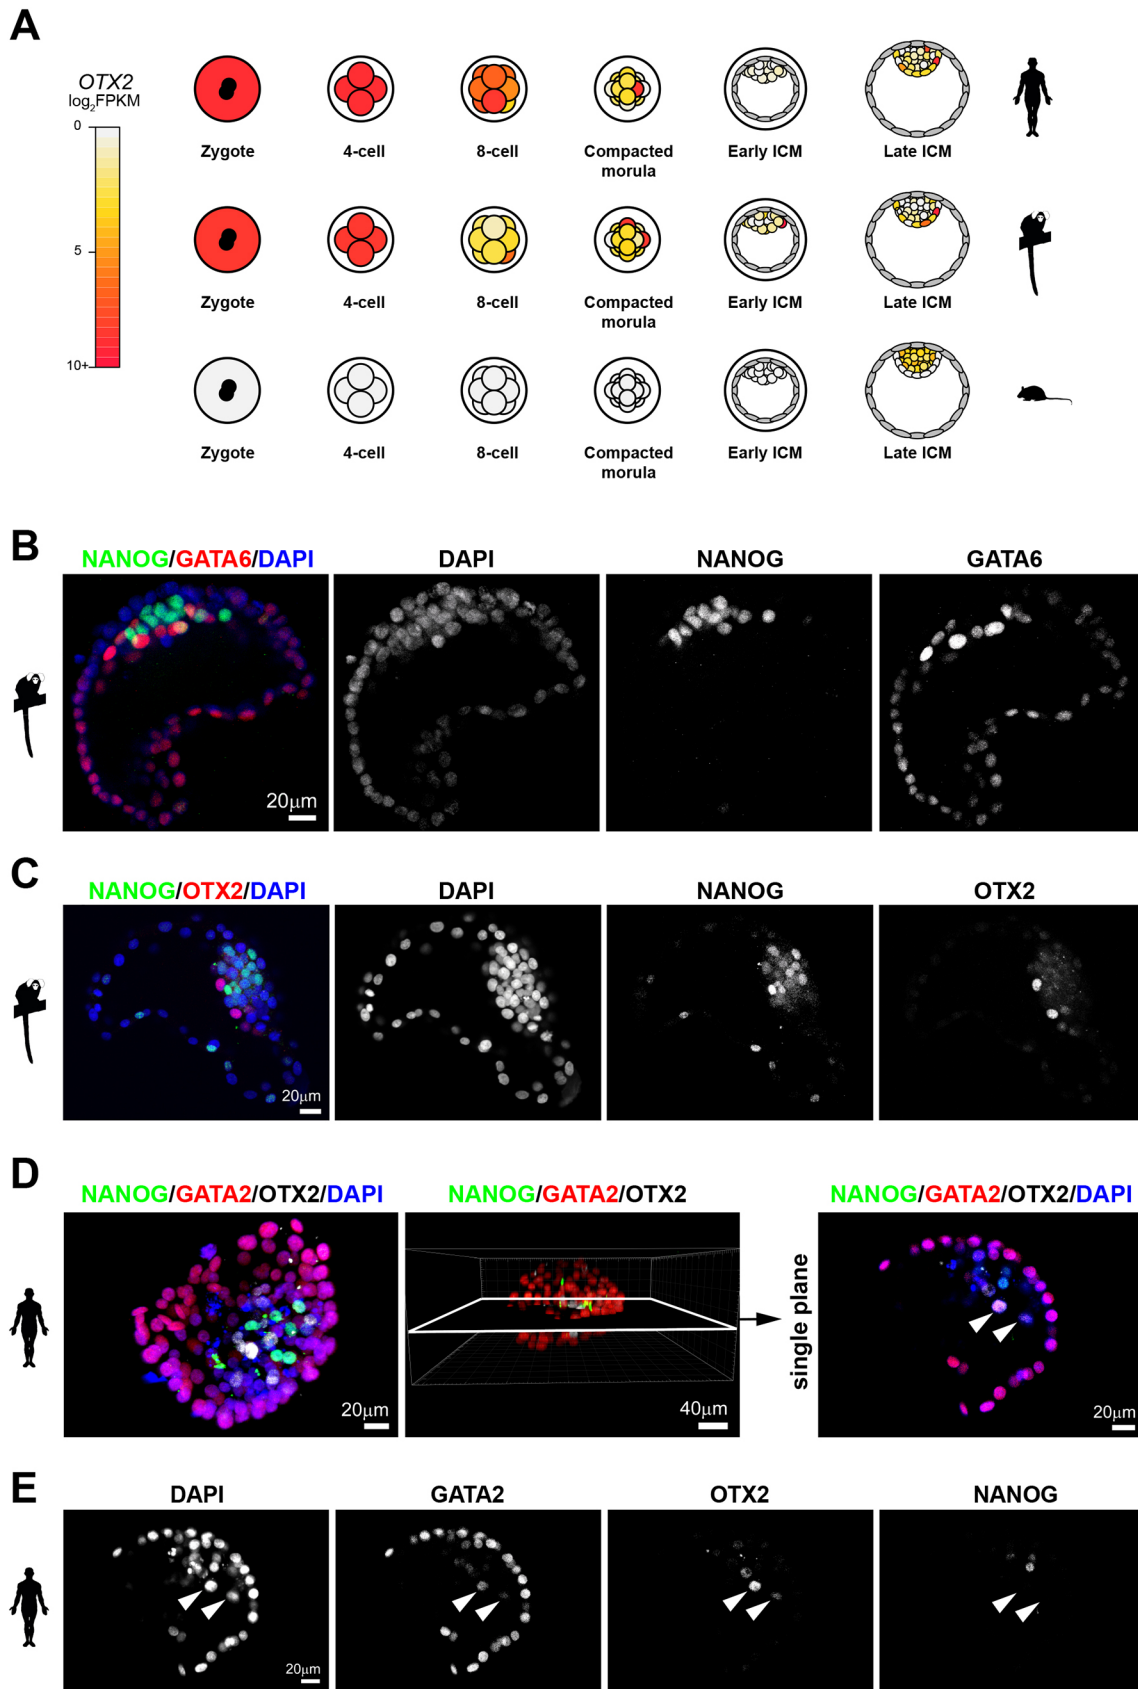

**Fig. 7. OTX2 protein localisation in primate embryos.** (A) Schematic of Otx2 expression over preimplantation development. (B,C) Confocal microscopy immunofluorescence images of (B) NANOG, GATA6 and DAPI, and (C) NANOG, OTX2 and DAPI in marmoset late blastocysts. (D) Confocal sections, 3D reconstruction and single-plane image of NANOG, GATA2, OTX2 and DAPI localisation in an early human blastocyst. (E) Confocal sections of the indicated markers in a representative late human blastocyst. White arrowheads indicate PrE cells.

was guided by gene annotation from Ensembl release 87 and splice junction donor/acceptor overlap settings were tailored to the read length of each dataset. Alignments to gene loci were quantified with *htseq-count* (Anders et al., 2015) based on annotation from Ensembl 87 (Yates et al., 2016). Sequencing libraries with fewer than 500 K mapped reads were excluded from subsequent analyses. Read distribution bias across gene bodies was computed as the ratio between the total reads spanning the 50th to the 100th percentile of gene length, and those between the first and 49th. Samples with ratio >2 were not considered further.

### Transcriptome analysis

Principal component and cluster analyses were performed based on  $\log_2$  FPKM values computed with the Bioconductor packages *DESeq2* (Love et al., 2014), *SinCell* (Juliá et al., 2015) or *FactoMineR* (Lê et al., 2008) in conjunction with custom scripts. If not otherwise indicated, default parameters were used. Differential expression analysis was performed with *scde* (Kharchenko et al., 2014), which fits individual error models for the assessment of differential expression between sample groups. For global analyses, genes that registered zero counts in all single-cell samples in a given comparison were omitted. Euclidean distance and average agglomeration methods were used for cluster analyses. Volcano plots were computed with  $\log_2$  fold change and  $-\log_{10}$  *P*-values from *DESeq2* differential analysis output. Mutual information scores were computed with the *infotheo* R package. Orthology mapping was performed according to gene annotation in Ensembl release 87 with human as the reference species. Multiple orthologies were deconvoluted based on the percentage of gene sequence similarity, as defined in Ensembl. Expression data are available in supplementary Tables S2 and S4 and through a web application (genome-wide rodent and primate preimplantation atlas) to visualise expression levels of individual genes in embryonic lineages (app.stemcells.cam.ac.uk/GRAPPA).

### Selection of high-variability genes

Genes exhibiting the greatest expression variability (and thus contributing substantial discriminatory power) were identified by fitting a non-linear regression curve between average  $\log_2$  FPKM and the square of coefficient of variation. Thresholds were applied along the *x*-axis (average  $\log_2$  FPKM) and *y*-axis ( $\log CV^2$ ) to identify the most variable genes.

### Evaluation of refined embryonic cell populations

To assess the accuracy of selected EPI, PrE and early ICM cells, we used the weighted gene co-expression network analysis unsupervised clustering method (WGCNA; Langfelder and Horvath, 2008) to identify specific modules of co-expressed genes in each developmental lineage. A soft power threshold of 10 was set to govern the correlation metric and a tree-pruning approach (Langfelder et al., 2008) was implemented to merge similar modules (threshold 0.35). The minimum module size was set to 50 genes; from the modules computed, the top 50 genes with greatest intramodular connectivity were selected for subsequent co-expression network analysis.

### Pseudotime analysis

Temporal trajectories were computed with the *monocle* R package (Trapnell et al., 2014), using the DDRtree reduction and *vstExprs* normalisation options. As different numbers of cells were profiled from each species and developmental stages in the datasets considered, uniform cell numbers were sampled from each group and the average was reported from 100 sampling iterations.

### Network analysis of biological processes

Statistical enrichment of Gene Ontology (GO) terms was computed with the *GOstats* Bioconductor package, DAVID 6.8 (Huang et al., 2009) and EnrichR web tools (Kuleshov et al., 2016). *Cytoscape* (Shannon et al., 2003; Smoot et al., 2011) and the associated enrichment map plug-in were used for network construction and visualisation. For network diagrams, node size is scaled by the number of genes contributing to over-representation of biological processes; edges are plotted in widths proportional to the overlap between gene sets.

### Derivation of stage-specific expression modules

The R package *kohonen* was used to construct self-organising maps (SOM) across embryonic stages for human, marmoset and mouse. Variation in transcriptional activity was identified using a matrix of 30×30 with hexagonal topology. Stage-specific GO analyses were performed with *GOstats* package considering genes with *Z*-score>1.5, while genes with *Z*-score<1.5 in all stages were used for the background set. Annotation related to transcription factors, co-factors and chromatin remodelling factors was obtained from AnimalTFDB 2.0 (Zhang et al., 2015). Marmoset late lineage markers were selected as genes expressed in EPI or PrE cells with a transcriptional contribution more than 75% across all selected pre-implantation stages and minimum level of 10 FPKM. Early markers were identified as genes present at later stages (from eight-cell morulae to either EPI or PrE lineages) with a transcriptional contribution of more than 75% across all selected pre-implantation stages. A fold-change induction of at least four between lineages and minimum level of 10 FPKM in at least one of the following stages was required: eight-cell, compacted morula, early ICM, EPI or PrE.

### Identification of EPI- and PrE-associated transcription factors

A two-step process was used to determine sets of transcription factors, co-factors and chromatin remodellers enriched in embryonic lineages of the species analysed. Genes expressed at greater than 5 FPKM in the subject lineage (e.g. EPI) and not significantly downregulated in the other (e.g. PrE) were selected in human, marmoset and mouse, and averaged for all cells annotated in each cell type. Genes in common with all species or, alternatively, specific to primate, were compared between EPI and PrE modules. Ternary plots were produced with the R package *ggtern* using the relative percentage of average expression for all cells in EPI and PrE lineages. Protein-protein interactions between factors expressed in a primate-specific context or common to all species were computed based on entries curated in the STRING database (Szklarczyk et al., 2017).

### Transposable element analysis

RepeatMasker annotations for human, marmoset and mouse genomes were obtained from the UCSC Table Browser (Karolchik et al., 2004). To calculate expression levels for transposable elements, adapter-trimmed RNA-seq reads were aligned to the respective reference genome with *bowtie* (Langmead and Salzberg, 2012) using parameters '-m1 -v2 -best -strata' and selecting reads with unique alignment to individual elements, allowing two mismatches. Read counts for repeat regions and Ensembl transcripts were obtained by *featureCounts* (Liao et al., 2014), normalised by the total number of reads that mapped to Ensembl protein-coding transcripts, and subsequently normalised by repeat length. Differential expression between stages was evaluated with *DESeq2*.

### Immunofluorescence staining

Human and marmoset embryos were stained as previously described (Nichols et al., 2009; Boroviak et al., 2015). Primary antibodies were NANOG (Cell Signaling Technology, 4893; 1:400), GATA6 (R&D Systems, AF1700; 1:100), OTX2 (R&D Systems, AF1979; 1:200) and GATA2 (Abcam, ab173817; 1:100).

### Confocal imaging and analysis

Confocal images were acquired using a Leica TCS SP5 microscope. Optical section thickness ranged from 1-3  $\mu\text{m}$ . Images were processed using Leica software, Imaris, Volocity and ImageJ (Fiji). Automated image analysis was performed in Volocity. Parameters for object identification were: guide size, 500  $\mu\text{m}^3$ ; separate objects, 500  $\mu\text{m}^3$ ; and objects larger than 500  $\mu\text{m}^3$  were excluded. Thresholds for background fluorescence intensity (Gata6:45, Nanog:25, Cdx2:35, DAPI:20) were empirically determined to recapitulate manual cell counts in DMSO control embryos (Fig. S7A-D). For two IWP2-treated embryos, the Nanog threshold was increased to 50 owing to very bright signal to ensure accurate quantification of cell nuclei.

### Competing interests

The authors declare no competing or financial interests.

## Author contributions

Conceptualization: T.B., G.G.S., A.S., J.N., P.B.; Methodology: T.B., G.G.S., S.D., I.H.-H., H.M., W.R., E.S., P.B.; Software: G.G.S., S.D.; Validation: T.B.; Formal analysis: G.G.S., S.D., P.B.; Investigation: T.B., G.G.S., P.B.; Resources: T.B., I.H.-H., H.M., W.R., E.S., P.B.; Data curation: P.B.; Writing - original draft: T.B., G.G.S., P.B.; Writing - review & editing: T.B., G.G.S., A.S., J.N., P.B.; Visualization: T.B., G.G.S., S.D.; Supervision: W.R., A.S., E.S., J.N., P.B.; Project administration: A.S., J.N., P.B.; Funding acquisition: A.S., J.N., P.B.

## Funding

This work was supported by grants from the Biotechnology and Biological Sciences Research Council (BBSRC) UK (BB/M004023/1 (RG74277)), by the Medical Research Council (MRC) UK (G1001028), and by funding to the Cambridge Stem Cell Institute from the MRC and Wellcome Trust (097922/Z/11/Z, 203151/Z/16/Z). T.B. is a Wellcome Trust Sir Henry Dale Fellow. A.S. is an MRC Professor. Deposited in PMC for immediate release.

## Data availability

Single-cell RNA-seq data from marmoset embryos are available in the ArrayExpress repository under accession number E-MTAB-7078.

## Supplementary information

Supplementary information available online at <http://dev.biologists.org/lookup/doi/10.1242/dev.167833.supplemental>

## References

- Acampora, D., Di Giovannantonio, L. G. and Simeone, A.** (2013). Otx2 is an intrinsic determinant of the embryonic stem cell state and is required for transition to a stable epiblast stem cell condition. *Development* **140**, 43-55.
- Acampora, D., Omodei, D., Petrosino, G., Garofalo, A., Savarese, M., Nigro, V., Di Giovannantonio, L. G., Mercadante, V. and Simeone, A.** (2016). Loss of the Otx2-binding site in the Nanog promoter affects the integrity of embryonic stem cell subtypes and specification of inner cell mass-derived epiblast. *Cell Rep.* **15**, 2651-2664.
- Akagi, T., Kuure, S., Uranishi, K., Koide, H., Costantini, F. and Yokota, T.** (2015). ETS-related transcription factors ETV4 and ETV5 are involved in proliferation and induction of differentiation-associated genes in embryonic stem (ES) cells. *J. Biol. Chem.* **290**, 22460-22473.
- Anders, S., Pyl, P. T. and Huber, W.** (2015). HTSeq—a Python framework to work with high-throughput sequencing data. *Bioinformatics* **31**, 166-169.
- Arnold, S. J. and Robertson, E. J.** (2009). Making a commitment: cell lineage allocation and axis patterning in the early mouse embryo. *Nat. Rev. Mol. Cell Biol.* **10**, 91-103.
- Artus, J. and Hadjantonakis, A.-K.** (2012). Troika of the mouse blastocyst: lineage segregation and stem cells. *Curr. Stem Cell Res. Ther.* **7**, 78-91.
- Artus, J., Panthier, J.-J. and Hadjantonakis, A.-K.** (2010). A role for PDGF signaling in expansion of the extra-embryonic endoderm lineage of the mouse blastocyst. *Development* **137**, 3361-3372.
- Artus, J., Piliszek, A. and Hadjantonakis, A.-K.** (2011). The primitive endoderm lineage of the mouse blastocyst: sequential transcription factor activation and regulation of differentiation by Sox17. *Dev. Biol.* **350**, 393-404.
- Bedzhov, I. and Zernicka-Goetz, M.** (2014). Self-organizing properties of mouse pluripotent cells initiate morphogenesis upon implantation. *Cell* **156**, 1032-11044.
- Beisel, C. and Paro, R.** (2011). Silencing chromatin: comparing modes and mechanisms. *Nat. Rev. Genet.* **12**, 123-135.
- Blakeley, P., Fogarty, N. M. E., Del Valle, I., Wamaitha, S. E., Hu, T. X., Elder, K., Snell, P., Christie, L., Robson, P. and Niakan, K. K.** (2015). Defining the three cell lineages of the human blastocyst by single-cell RNA-seq. *Development* **142**, 3151-3165.
- Boroviak, T. and Nichols, J.** (2017). Primate embryogenesis predicts the hallmarks of human naive pluripotency. *Development* **144**, 175-186.
- Boroviak, T., Loos, R., Lombard, P., Okahara, J., Behr, R., Sasaki, E., Nichols, J., Smith, A. and Bertone, P.** (2015). Lineage-specific profiling delineates the emergence and progression of naive pluripotency in mammalian embryogenesis. *Dev. Cell* **35**, 366-382.
- Bourc'his, D., Xu, G. L., Lin, C. S., Bollman, B. and Bestor, T. H.** (2001). Dnmt3L and the establishment of maternal genomic imprints. *Science* **294**, 2536-2539.
- Braude, P., Bolton, V. and Moore, S.** (1988). Human gene expression first occurs between the four- and eight-cell stages of preimplantation development. *Nature* **332**, 459-461.
- Buecker, C., Srinivasan, R., Wu, Z., Calo, E., Acampora, D., Faial, T., Simeone, A., Tan, M., Swigut, T. and Wysocka, J.** (2014). Reorganization of enhancer patterns in transition from naive to primed pluripotency. *Cell Stem Cell* **14**, 838-853.
- Collier, A. J., Panula, S. P., Schell, J. P., Chovanec, P., Plaza Reyes, A., Petropoulos, S., Corcoran, A. E., Walker, R., Douagi, I., Lanner, F. et al.** (2017). Comprehensive cell surface protein profiling identifies specific markers of human naive and primed pluripotent states. *Cell Stem Cell* **20**, 874-890.e7.
- Davies, O. R., Lin, C.-Y., Radzisheuskaya, A., Zhou, X., Taube, J., Blin, G., Waterhouse, A., Smith, A. J. H. and Lowell, S.** (2013). Tcf15 primes pluripotent cells for differentiation. *Cell Rep.* **3**, 472-484.
- de Lau, W., Peng, W. C., Gros, P. and Clevers, H.** (2014). The R-spondin/Lgr5/Rnf43 module: regulator of Wnt signal strength. *Genes Dev.* **28**, 305-316.
- Deglicert, A., Croft, G. F., Pietila, L. N., Zernicka-Goetz, M., Siggia, E. D. and Brivanlou, A. H.** (2016). Self-organization of the in vitro attached human embryo. *Nature* **533**, 251-254.
- Deng, Q., Ramsköld, D., Reinis, B. and Sandberg, R.** (2014). Single-cell RNA-seq reveals dynamic, random monoallelic gene expression in mammalian cells. *Science* **343**, 193-196.
- Dobin, A., Davis, C. A., Schlesinger, F., Drenkow, J., Zaleski, C., Jha, S., Batut, P., Chaisson, M. and Gingeras, T. R.** (2013). STAR: ultrafast universal RNA-seq aligner. *Bioinformatics* **29**, 15-21.
- Donohoe, M. E., Zhang, X., McGinnis, L., Biggers, J., Li, E. and Shi, Y.** (1999). Targeted disruption of mouse Yin Yang 1 transcription factor results in peri-implantation lethality. *Mol. Cell. Biol.* **19**, 7237-7244.
- Enders, A. C. and King, B. F.** (1988). Formation and differentiation of extraembryonic mesoderm in the rhesus monkey. *Am. J. Anat.* **181**, 327-340.
- Enders, A. C. and Lopata, A.** (1999). Implantation in the marmoset monkey: expansion of the early implantation site. *Anat. Rec.* **256**, 279-299.
- Enders, A. C., Schlafke, S. and Hendrickx, A. G.** (1986). Differentiation of the embryonic disc, amnion, and yolk sac in the rhesus monkey. *Am. J. Anat.* **177**, 161-185.
- Engström, P. G., Steijger, T., Sipos, B., Grant, G. R., Kahles, A., RGASP Consortium, Rättsch, G., Goldman, N., Hubbard, T. J., Harrow, J., Guigó, R. et al.** (2013). Systematic evaluation of spliced alignment programs for RNA-seq data. *Nat. Methods* **10**, 1185-1191.
- Fischedick, G., Klein, D. C., Wu, G., Esch, D., Höing, S., Han, D. W., Reinhardt, P., Hergarten, K., Tapia, N., Schöler, H. R. et al.** (2012). Zfp296 is a novel, pluripotent-specific reprogramming factor. *PLoS ONE* **7**, e34645.
- Friedli, M. and Trono, D.** (2015). The developmental control of transposable elements and the evolution of higher species. *Annu. Rev. Cell Dev. Biol.* **31**, 429-451.
- Fujii, Y., Kakegawa, M., Koide, H., Akagi, T. and Yokota, T.** (2013). Zfp296 is a novel Klf4-interacting protein and functions as a negative regulator. *Biochem. Biophys. Res. Commun.* **441**, 411-417.
- Fujikura, J., Yamato, E., Yonemura, S., Hosoda, K., Masui, S., Nakao, K., Miyazaki, J. and Niwa, H.** (2002). Differentiation of embryonic stem cells is induced by GATA factors. *Genes Dev.* **16**, 784-789.
- Gardner, R. L. and Rossant, J.** (1979). Investigation of the fate of 4-5 day post-coitum mouse inner cell mass cells by blastocyst injection. *J. Embryol. Exp. Morphol.* **52**, 141-152.
- Grabarek, J. B., Zzyńska, K., Saiz, N., Piliszek, A., Frankenberg, S., Nichols, J., Hadjantonakis, A.-K. and Plusa, B.** (2012). Differential plasticity of epiblast and primitive endoderm precursors within the ICM of the early mouse embryo. *Development* **139**, 129-139.
- Hanazawa, K., Mueller, T., Becker, T., Heistermann, M., Behr, R. and Sasaki, E.** (2012). Minimally invasive transabdominal collection of preimplantation embryos from the common marmoset monkey (*Callithrix jacchus*). *Theriogenology* **78**, 811-816.
- Hirasawa, R. and Feil, R.** (2008). A KRAB domain zinc finger protein in imprinting and disease. *Dev. Cell* **15**, 487-488.
- Howell, C. Y., Bestor, T. H., Ding, F., Latham, K. E., Mertineit, C., Trasler, J. M. and Chaillet, J. R.** (2001). Genomic imprinting disrupted by a maternal effect mutation in the Dnmt1 gene. *Cell* **104**, 829-838.
- Huang, D. W., Sherman, B. T. and Lempicki, R. A.** (2009). Systematic and integrative analysis of large gene lists using DAVID bioinformatics resources. *Nat. Protoc.* **4**, 44-57.
- Juliá, M., Telenti, A. and Rausell, A.** (2015). Sincell: an R/Bioconductor package for statistical assessment of cell-state hierarchies from single-cell RNA-seq. *Bioinformatics* **31**, 3380-3382.
- Kaiser, S., Koch, Y., Kühnel, E., Sharma, N., Gellhaus, A., Kuckenberger, P., Schorle, H. and Winterhager, E.** (2015). Reduced gene dosage of Tfp2c impairs trophoblast lineage differentiation and alters maternal blood spaces in the mouse placenta. *Biol. Reprod.* **93**, 31.
- Kalkan, T., Olova, N., Roode, M., Mulas, C., Lee, H. J., Nett, I., Marks, H., Walker, R., Stunnenberg, H. G., Lilley, K. S. et al.** (2017). Tracking the embryonic stem cell transition from ground state pluripotency. *Development* **144**, 1221-1234.
- Kang, M., Piliszek, A., Artus, J. and Hadjantonakis, A.-K.** (2013). FGF4 is required for lineage restriction and salt-and-pepper distribution of primitive endoderm factors but not their initial expression in the mouse. *Development* **140**, 267-279.
- Karolchik, D., Hinrichs, A. S., Furey, T. S., Roskin, K. M., Sugnet, C. W., Haussler, D. and Kent, W. J.** (2004). The UCSC Table Browser data retrieval tool. *Nucleic Acids Res.* **32**, D493-D496.
- Kashif, M., Hellwig, A., Kollerker, A., Shahzad, K., Wang, H., Lang, S., Wolter, J., Thati, M., Vinnikov, I., Bierhaus, A. et al.** (2011). p45NF-E2 represses Gcm1 in trophoblast cells to regulate syncytium formation, placental vascularization and embryonic growth. *Development* **138**, 2235-2247.



- Kharchenko, P. V., Silberstein, L. and Scadden, D. T. (2014). Bayesian approach to single-cell differential expression analysis. *Nat. Methods* **11**, 740-742.
- Kim, K.-H. and Lee, K.-A. (2014). Maternal effect genes: findings and effects on mouse embryo development. *Clin. Exp. Reprod. Med.* **41**, 47-61.
- Kinoshita, M., Shimosato, D., Yamane, M. and Niwa, H. (2015). Sox7 is dispensable for primitive endoderm differentiation from mouse ES cells. *BMC Dev. Biol.* **15**, 37.
- Kohonen, T. (1982). Self-organized formation of topologically correct feature maps. *Biol. Cybern.* **43**, 59-69.
- Kuleshov, M. V., Jones, M. R., Rouillard, A. D., Fernandez, N. F., Duan, Q., Wang, Z., Koplev, S., Jenkins, S. L., Jagodnik, K. M., Lachmann, A. et al. (2016). Enrichr: a comprehensive gene set enrichment analysis web server 2016 update. *Nucleic Acids Res.* **44**, W90-W97.
- Langfelder, P. and Horvath, S. (2008). WGCNA: an R package for weighted correlation network analysis. *BMC Bioinformatics* **9**, 559.
- Langfelder, P., Zhang, B. and Horvath, S. (2008). Defining clusters from a hierarchical cluster tree: the Dynamic Tree Cut package for R. *Bioinformatics* **24**, 719-720.
- Langmead, B. and Salzberg, S. L. (2012). Fast gapped-read alignment with Bowtie 2. *Nat. Methods* **9**, 357-359.
- Lê, S., Josse, J. and Husson, F. (2008). FactoMineR: an R package for multivariate analysis. *J. Stat. Softw.* **25**, 1-18.
- Leeb, M., Dietmann, S., Paramor, M., Niwa, H. and Smith, A. (2014). Genetic exploration of the exit from self-renewal using haploid embryonic stem cells. *Cell Stem Cell* **14**, 385-393.
- Liao, Y., Smyth, G. K. and Shi, W. (2014). featureCounts: an efficient general purpose program for assigning sequence reads to genomic features. *Bioinformatics* **30**, 923-930.
- Love, M. I., Huber, W. and Anders, S. (2014). Moderated estimation of fold change and dispersion for RNA-seq data with DESeq2. *Genome Biol.* **15**, 550.
- Lowell, S., Benchoua, A., Heavey, B. and Smith, A. G. (2006). Notch promotes neural lineage entry by pluripotent embryonic stem cells. *PLoS Biol.* **4**, e121.
- Lu, X., He, Y., Zhu, C., Wang, H., Chen, S. and Lin, H.-Y. (2016). Twist1 is involved in trophoblast syncytialization by regulating GCM1. *Placenta* **39**, 45-54.
- Martello, G., Bertone, P. and Smith, A. (2013). Identification of the missing pluripotency mediator downstream of leukaemia inhibitory factor. *EMBO J.* **32**, 2561-2574.
- Matsuura, T., Miyazaki, S., Miyazaki, T., Tashiro, F. and Miyazaki, J.-I. (2017). Zfp296 negatively regulates H3K9 methylation in embryonic development as a component of heterochromatin. *Sci. Rep.* **7**, 12462.
- McDonald, A. C. H., Biechele, S., Rossant, J. and Stanford, W. L. (2014). Sox17-mediated XEN cell conversion identifies dynamic networks controlling cell-fate decisions in embryo-derived stem cells. *Cell Rep.* **9**, 780-793.
- Mohammed, H., Hernando-Herraez, I., Savino, A., Scialdone, A., Macaulay, I., Mulas, C., Chandra, T., Voet, T., Dean, W., Nichols, J. et al. (2017). Single-cell landscape of transcriptional heterogeneity and cell fate decisions during mouse early gastrulation. *Cell Rep.* **20**, 1215-1228.
- Morey, L., Santanach, A. and Di Croce, L. (2015). Pluripotency and epigenetic factors in mouse embryonic stem cell fate regulation. *Mol. Cell Biol.* **35**, 2716-2728.
- Nakamura, T., Okamoto, I., Sasaki, K., Yabuta, Y., Iwatani, C., Tsuchiya, H., Seita, Y., Nakamura, S., Yamamoto, T. and Saitou, M. (2016). A developmental coordinate of pluripotency among mice, monkeys and humans. *Nature* **537**, 57-62.
- Nam, J.-S., Turcotte, T. J., Smith, P. F., Choi, S. and Yoon, J. K. (2006). Mouse cristin/R-spondin family proteins are novel ligands for the Frizzled 8 and LRP6 receptors and activate beta-catenin-dependent gene expression. *J. Biol. Chem.* **281**, 13247-13257.
- Niakan, K. K. and Eggan, K. (2013). Analysis of human embryos from zygote to blastocyst reveals distinct gene expression patterns relative to the mouse. *Dev. Biol.* **375**, 54-64.
- Nichols, J., Zevnik, B., Anastassiadis, K., Niwa, H., Klewe-Nebenius, D., Chambers, I., Schöler, H. and Smith, A. (1998). Formation of pluripotent stem cells in the mammalian embryo depends on the POU transcription factor Oct4. *Cell* **95**, 379-391.
- Nichols, J., Silva, J., Roode, M. and Smith, A. (2009). Suppression of Erk signalling promotes ground state pluripotency in the mouse embryo. *Development* **136**, 3215-3222.
- Ohnishi, Y., Huber, W., Tsumura, A., Kang, M., Xenopoulos, P., Kurimoto, K., Oleś, A. K., Araúzo-Bravo, M. J., Saitou, M., Hadjantonakis, A.-K. et al. (2014). Cell-to-cell expression variability followed by signal reinforcement progressively segregates early mouse lineages. *Nat. Cell Biol.* **16**, 27-37.
- Okano, M., Bell, D. W., Haber, D. A. and Li, E. (1999). DNA methyltransferases Dnmt3a and Dnmt3b are essential for de novo methylation and mammalian development. *Cell* **99**, 247-257.
- Pastor, W. A., Chen, D., Liu, W., Kim, R., Sahakyan, A., Lukianchikov, A., Plath, K., Jacobsen, S. E. and Clark, A. T. (2016). Naïve human pluripotent cells feature a methylation landscape devoid of blastocyst or germline memory. *Cell Stem Cell* **18**, 323-329.
- Perea-Gomez, A., Lawson, K. A., Rhinn, M., Zakin, L., Brûlet, P., Mazan, S. and Ang, S. L. (2001). Otx2 is required for visceral endoderm movement and for the restriction of posterior signals in the epiblast of the mouse embryo. *Development* **128**, 753-765.
- Pereira, P. N. G., Dobрева, M. P., Graham, L., Huylebroeck, D., Lawson, K. A. and Zwijsen, A. N. (2011). Amnion formation in the mouse embryo: the single amniochorionic fold model. *BMC Dev. Biol.* **11**, 48.
- Petropoulos, S., Edsgard, D., Reinius, B., Deng, Q., Panula, S. P., Codeluppi, S., Plaza Reyes, A., Linnarsson, S., Sandberg, R. and Lanner, F. (2016). Single-cell RNA-seq reveals lineage and X chromosome dynamics in human preimplantation embryos. *Cell* **165**, 1012-1026.
- Picelli, S., Björklund, Å. K., Faridani, O. R., Sagasser, S., Winberg, G. and Sandberg, R. (2013). Smart-seq2 for sensitive full-length transcriptome profiling in single cells. *Nat. Methods* **10**, 1096-1098.
- Picelli, S., Faridani, O. R., Björklund, Å. K., Winberg, G., Sagasser, S. and Sandberg, R. (2014). Full-length RNA-seq from single cells using Smart-seq2. *Nat. Protoc.* **9**, 171-181.
- Plusa, B., Piliszek, A., Frankenberg, S., Artus, J. and Hadjantonakis, A.-K. (2008). Distinct sequential cell behaviours direct primitive endoderm formation in the mouse blastocyst. *Development* **135**, 3081-3091.
- Riso, V., Cammisa, M., Kukreja, H., Anvar, Z., Verde, G., Sparago, A., Acurzio, B., Lad, S., Lonardo, E., Sankar, A. et al. (2016). ZFP57 maintains the parent-of-origin-specific expression of the imprinted genes and differentially affects non-imprinted targets in mouse embryonic stem cells. *Nucleic Acids Res.* **44**, 8165-8178.
- Rivera-Pérez, J. A., Mager, J. and Magnuson, T. (2003). Dynamic morphogenetic events characterize the mouse visceral endoderm. *Dev. Biol.* **261**, 470-487.
- Rock, J. and Hertig, A. T. (1948). The human conceptus during the first two weeks of gestation. *Am. J. Obstet. Gynecol.* **55**, 6-17.
- Roode, M., Blair, K., Snell, P., Elder, K., Marchant, S., Smith, A. and Nichols, J. (2012). Human hypoblast formation is not dependent on FGF signalling. *Dev. Biol.* **361**, 358-363.
- Rossant, J. and Tam, P. P. L. (2009). Blastocyst lineage formation, early embryonic asymmetries and axis patterning in the mouse. *Development* **136**, 701-713.
- Saiz, N. and Plusa, B. (2013). Early cell fate decisions in the mouse embryo. *Reproduction* **145**, R65-R80.
- Sasaki, K., Nakamura, T., Okamoto, I., Yabuta, Y., Iwatani, C., Tsuchiya, H., Seita, Y., Nakamura, S., Shiraki, N., Takakuwa, T. et al. (2016). The germ cell fate of cynomolgus monkeys is specified in the nascent amnion. *Dev. Cell* **39**, 169-185.
- Schrode, N., Xenopoulos, P., Piliszek, A., Frankenberg, S., Plusa, B. and Hadjantonakis, A.-K. (2013). Anatomy of a blastocyst: cell behaviors driving cell fate choice and morphogenesis in the early mouse embryo. *Genesis* **51**, 219-233.
- Schrode, N., Saiz, N., Di Talia, S. and Hadjantonakis, A.-K. (2014). GATA6 levels modulate primitive endoderm cell fate choice and timing in the mouse blastocyst. *Dev. Cell* **29**, 454-467.
- Shannon, P., Markiel, A., Ozier, O., Baliga, N. S., Wang, J. T., Ramage, D., Amin, N., Schwikowski, B. and Ideker, T. (2003). Cytoscape: a software environment for integrated models of biomolecular interaction networks. *Genome Res.* **13**, 2498-2504.
- Sharma, N., Kubaczka, C., Kaiser, S., Nettersheim, D., Mughal, S. S., Riesenberger, S., Hölzel, M., Winterhager, E. and Schorle, H. (2016). Tpbpa-Cre-mediated deletion of TFAP2C leads to deregulation of Cdkn1a, Akt1 and the ERK pathway, causing placental growth arrest. *Development* **143**, 787-798.
- Sheng, G. (2015). Epiblast morphogenesis before gastrulation. *Dev. Biol.* **401**, 17-24.
- Silvester, N., Alako, B., Amid, C., Cerdeño-Tarraga, A., Clarke, L., Cleland, I., Harrison, P. W., Jayathilaka, S., Kay, S., Keane, T. et al. (2018). The European nucleotide archive in 2017. *Nucleic Acids Res.* **46**, D36-D40.
- Skamagki, M., Correia, C., Yeung, P., Baslan, T., Beck, S., Zhang, C., Ross, C. A., Dang, L., Liu, Z., Giunta, S. et al. (2017). ZSCAN10 expression corrects the genomic instability of iPSCs from aged donors. *Nat. Cell Biol.* **19**, 1037-1048.
- Smoot, M. E., Ono, K., Ruschinski, J., Wang, P.-L. and Ideker, T. (2011). Cytoscape 2.8: new features for data integration and network visualization. *Bioinformatics* **27**, 431-432.
- Solter, D. and Knowles, B. B. (1975). Immunosurgery of mouse blastocyst. *Proc. Natl. Acad. Sci. USA* **72**, 5099-5102.
- Stirparo, G. G., Boroviak, T., Guo, G., Nichols, J., Smith, A. and Bertone, P. (2018). Integrated analysis of single-cell embryo data yields a unified transcriptome signature for the human pre-implantation epiblast. *Development* **145**, dev158501.
- Stoecklin, G., Colombi, M., Raineri, I., Leuenberger, S., Mallau, M., Schmidlin, M., Gross, B., Lu, M., Kitamura, T. and Moroni, C. (2002). Functional cloning of BRF1, a regulator of ARE-dependent mRNA turnover. *EMBO J.* **21**, 4709-4718.
- Strogantsev, R., Krueger, F., Yamazawa, K., Shi, H., Gould, P., Goldman-Roberts, M., McEwen, K., Sun, B., Pedersen, R. and Ferguson-Smith, A. C. (2015). Allele-specific binding of ZFP57 in the epigenetic regulation of imprinted and non-imprinted monoallelic expression. *Genome Biol.* **16**, 122.
- Subramanian, A., Tamayo, P., Mootha, V. K., Mukherjee, S., Ebert, B. L., Gillette, M. A., Paulovich, A., Pomeroy, S. L., Golub, T. R., Lander, E. S. et al. (2005).

- Gene set enrichment analysis: a knowledge-based approach for interpreting genome-wide expression profiles. *Proc. Natl. Acad. Sci. USA* **102**, 15545-15550.
- Szklarczyk, D., Morris, J. H., Cook, H., Kuhn, M., Wyder, S., Simonovic, M., Santos, A., Doncheva, N. T., Roth, A., Bork, P. et al. (2017). The STRING database in 2017: quality-controlled protein-protein association networks, made broadly accessible. *Nucleic Acids Res.* **45**, D362-D368.
- Takahashi, T., Hanazawa, K., Inoue, T., Sato, K., Sedohara, A., Okahara, J., Suemizu, H., Yagihashi, C., Yamamoto, M., Eto, T. et al. (2014). Birth of healthy offspring following ICSI in in vitro-matured common marmoset (*Callithrix jacchus*) oocytes. *PLoS ONE* **9**, e95560.
- Tanaka, Y., Patestos, N. P., Maekawa, T. and Ishii, S. (1999). B-myb is required for inner cell mass formation at an early stage of development. *J. Biol. Chem.* **274**, 28067-28070.
- Theunissen, T. W., Friedli, M., He, Y., Planet, E., O'Neil, R. C., Markoulaki, S., Pontis, J., Wang, H., Iouranova, A., Imbeault, M. et al. (2016). Molecular criteria for defining the naïve human pluripotent state. *Cell Stem Cell* **19**, 502-515.
- Thomas, P. Q., Brown, A. and Beddington, R. S. (1998). Hex: a homeobox gene revealing peri-implantation asymmetry in the mouse embryo and an early transient marker of endothelial cell precursors. *Development* **125**, 85-94.
- Thomson, J. A., Kalishman, J. and Hearn, J. P. (1994). Nonsurgical uterine stage preimplantation embryo collection from the common marmoset. *J. Med. Primatol.* **23**, 333-336.
- Trapnell, C., Cacchiarelli, D., Grimsby, J., Pokharel, P., Li, S., Morse, M., Lennon, N. J., Livak, K. J., Mikkelsen, T. S. and Rinn, J. L. (2014). The dynamics and regulators of cell fate decisions are revealed by pseudotemporal ordering of single cells. *Nat. Biotechnol.* **32**, 381-386.
- Tseng, W.-C., Munisha, M., Gutierrez, J. B. and Dougan, S. T. (2017). Establishment of the vertebrate germ layers. *Adv. Exp. Med. Biol.* **953**, 307-381.
- Wray, J., Kalkan, T., Gomez-Lopez, S., Eckardt, D., Cook, A., Kemler, R. and Smith, A. (2011). Inhibition of glycogen synthase kinase-3 alleviates Tcf3 repression of the pluripotency network and increases embryonic stem cell resistance to differentiation. *Nat. Cell Biol.* **13**, 838-845.
- Yan, L., Yang, M., Guo, H., Yang, L., Wu, J., Li, R., Liu, P., Lian, Y., Zheng, X., Yan, J. et al. (2013). Single-cell RNA-seq profiling of human preimplantation embryos and embryonic stem cells. *Nat. Struct. Mol. Biol.* **20**, 1131-1139.
- Yang, S.-H., Kalkan, T., Morissroe, C., Marks, H., Stunnenberg, H., Smith, A. and Sharrocks, A. D. (2014). Otx2 and Oct4 drive early enhancer activation during embryonic stem cell transition from naïve pluripotency. *Cell Rep.* **7**, 1968-1981.
- Yates, A., Akanni, W., Amode, M. R., Barrell, D., Billis, K., Carvalho-Silva, D., Cummins, C., Clapham, P., Fitzgerald, S., Gil, L. et al. (2016). Ensembl 2016. *Nucleic Acids Res.* **44**, D710-D716.
- Ye, S., Li, P., Tong, C. and Ying, Q.-L. (2013). Embryonic stem cell self-renewal pathways converge on the transcription factor Tfcp2l1. *EMBO J.* **32**, 2548-2560.
- Yi, F., Pereira, L., Hoffman, J. A., Shy, B. R., Yuen, C. M., Liu, D. R. and Merrill, B. J. (2011). Opposing effects of Tcf3 and Tcf1 control Wnt stimulation of embryonic stem cell self-renewal. *Nat. Cell Biol.* **13**, 762-770.
- Zhang, B. and Horvath, S. (2005). A general framework for weighted gene co-expression network analysis. *Stat. Appl. Genet. Mol. Biol.* **4**, Article17.
- Zhang, H.-M., Liu, T., Liu, C.-J., Song, S., Zhang, X., Liu, W., Jia, H., Xue, Y. and Guo, A.-Y. (2015). AnimalTFDB 2.0: a resource for expression, prediction and functional study of animal transcription factors. *Nucleic Acids Res.* **43**, D76-D81.
